# Supplementary material
Source: PubMed Central journal article supplement (PMC6021131)

## Uncropped versions of blots

### Supplementary Figure 1

#### Supplementary Figure to Figure 1m

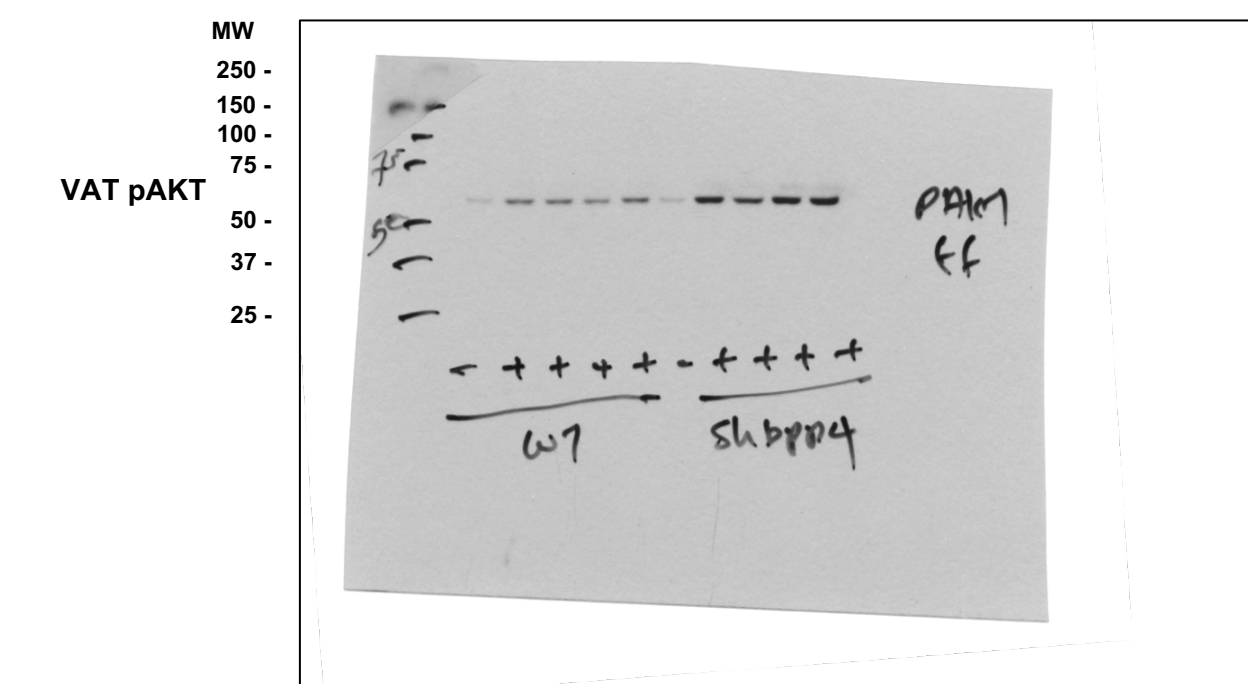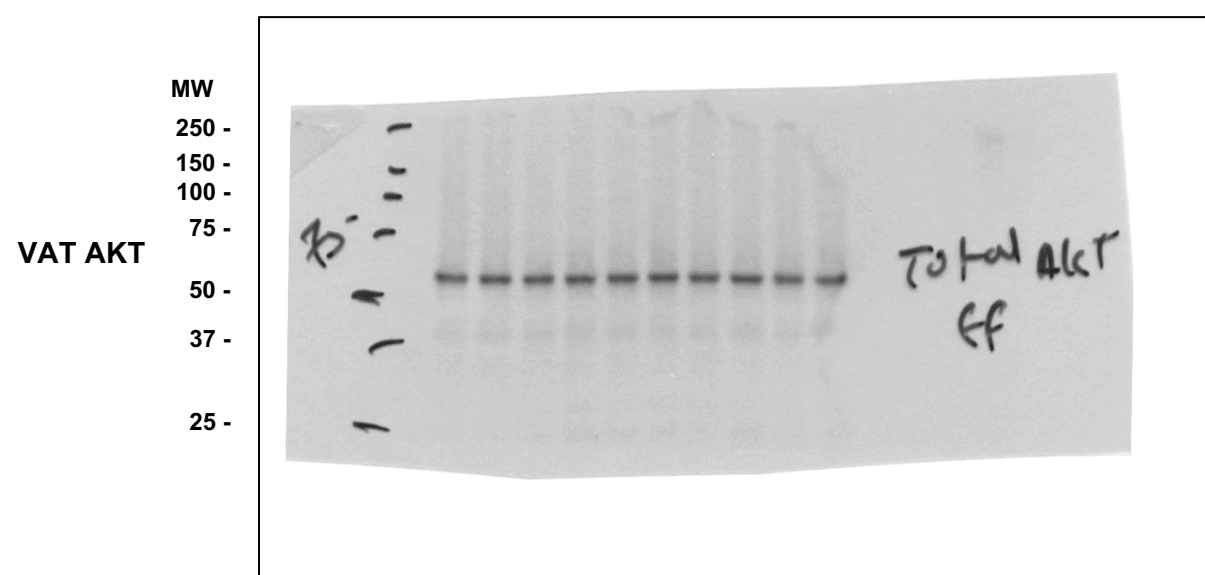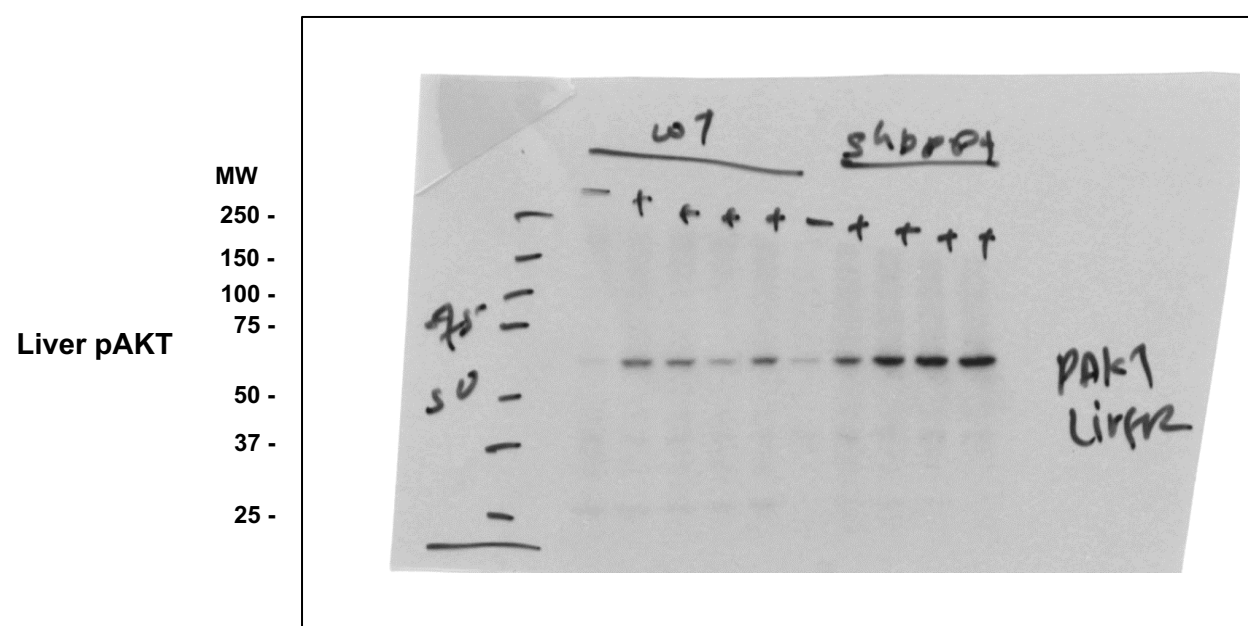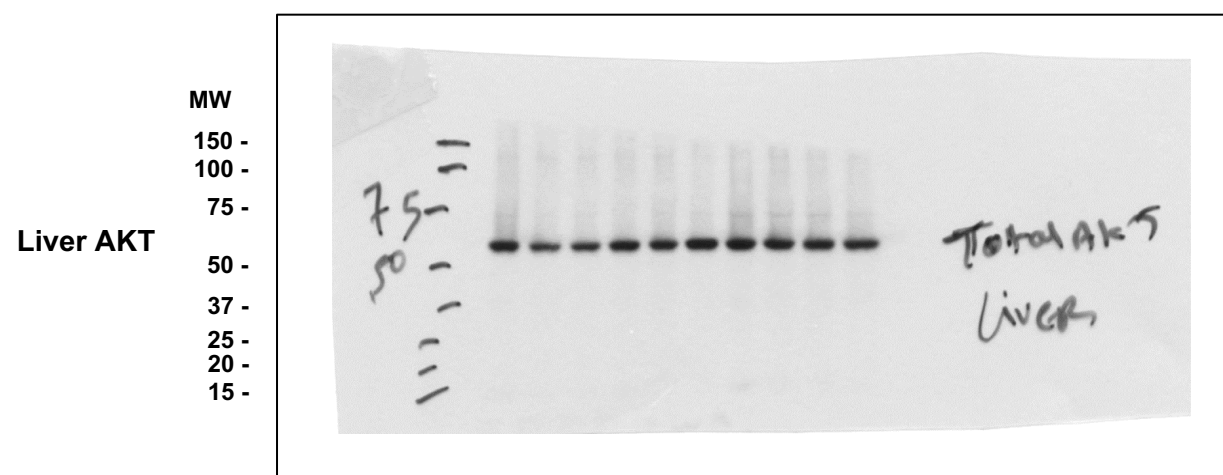

**Supplementary Figure 2**  
**Supplementary Figure to Figure 2c**

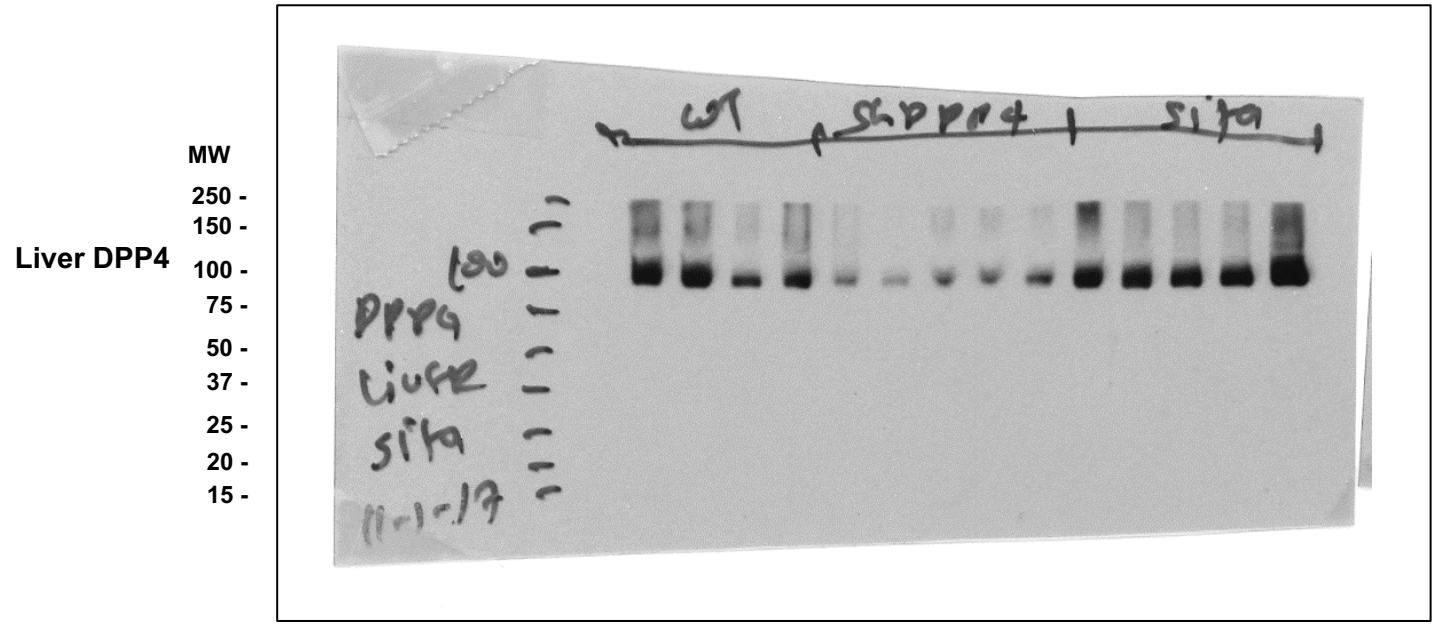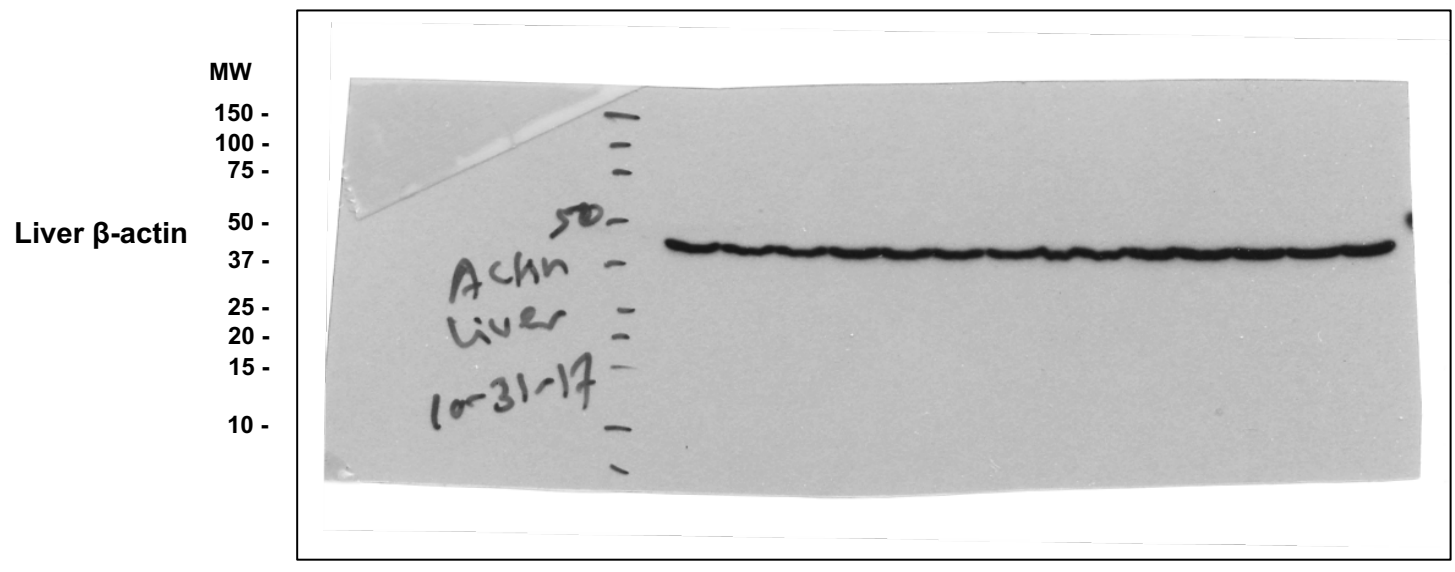

### Supplementary Figure 3 Supplementary Figure to Figure 2i

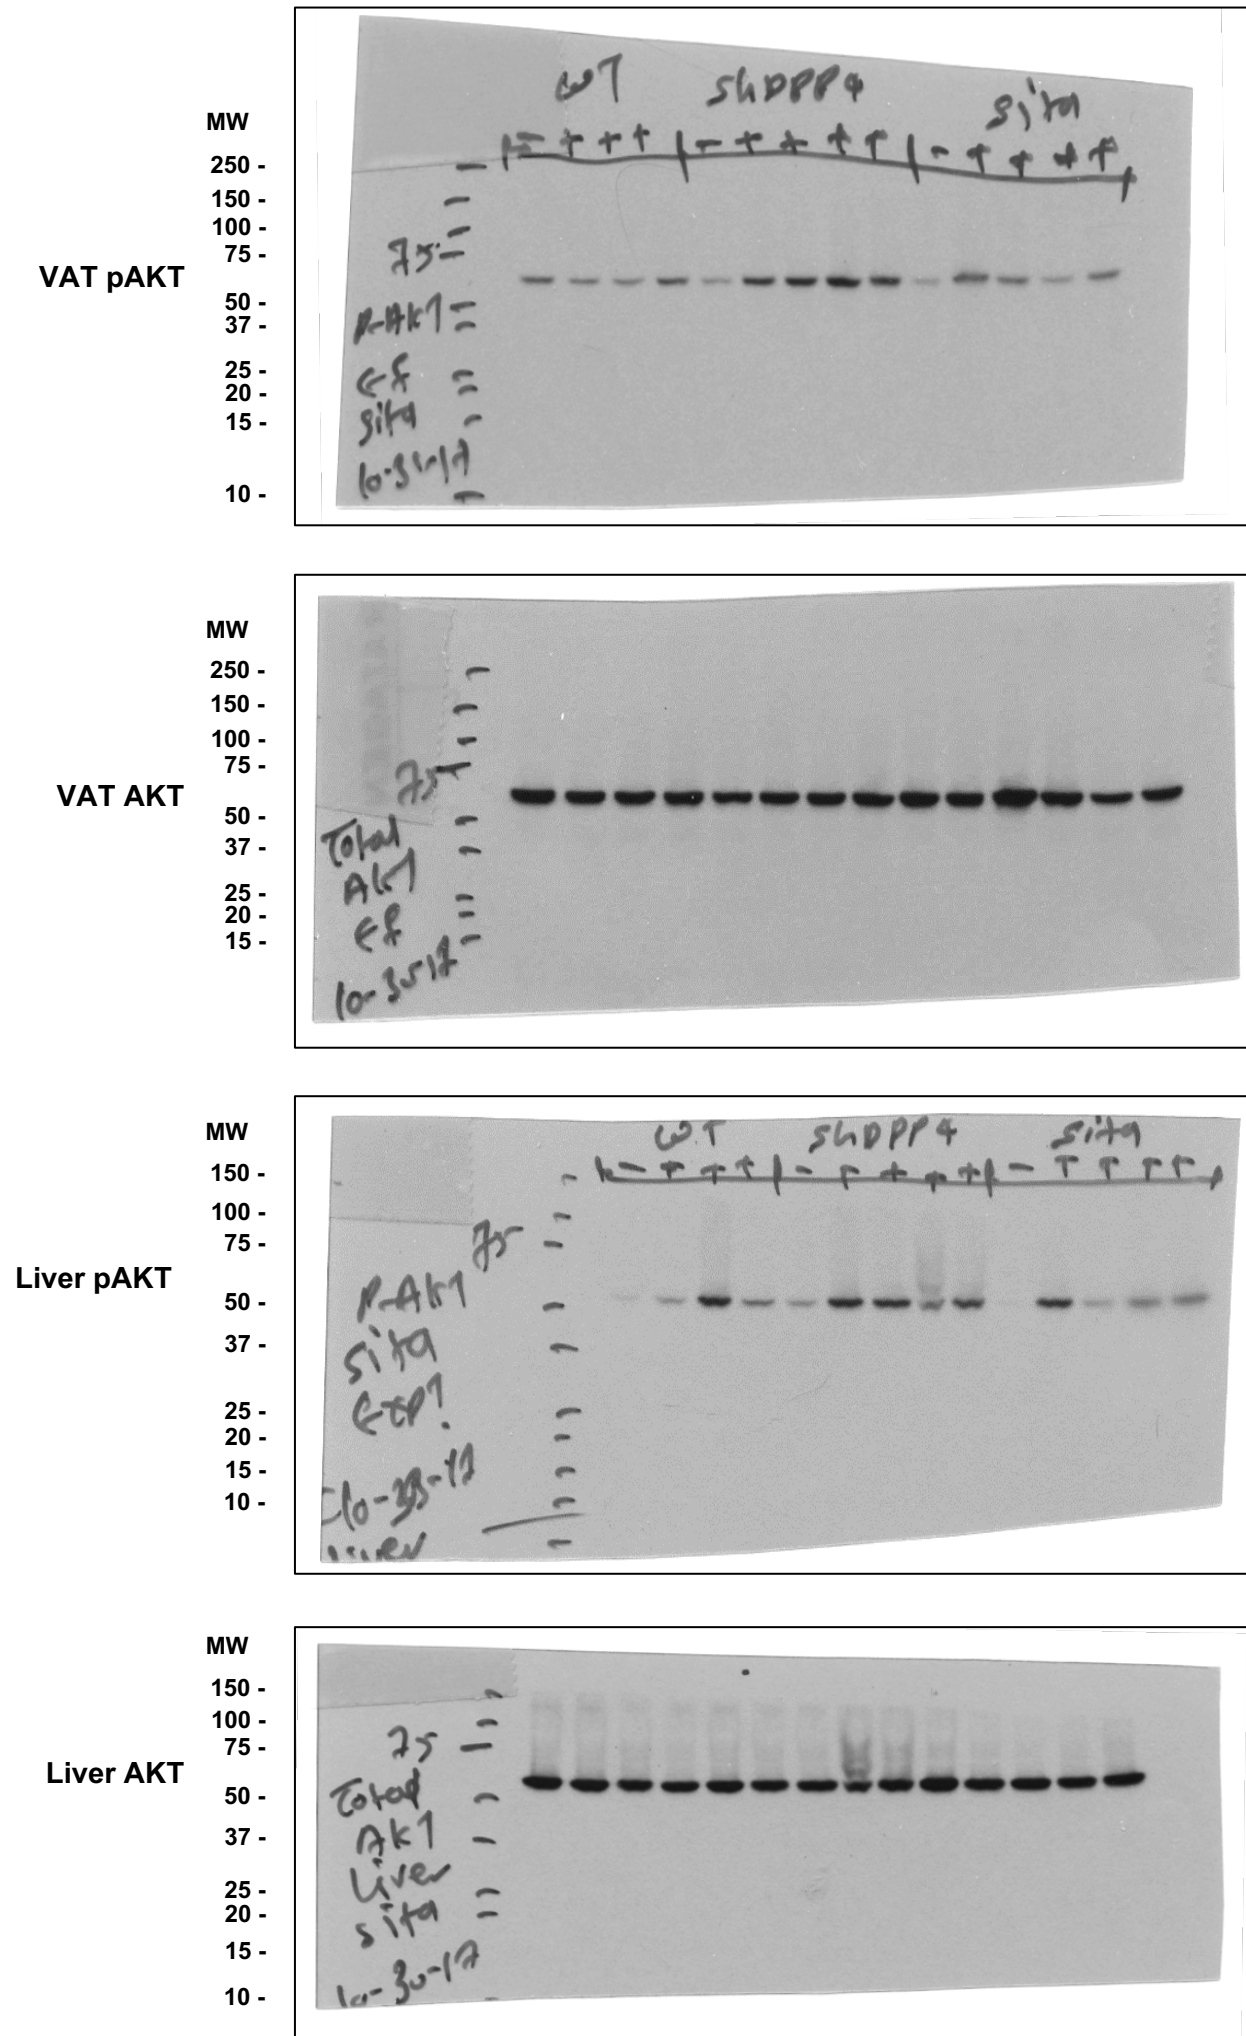

### Supplementary Figure 4 Supplementary Figure to Figure 3c

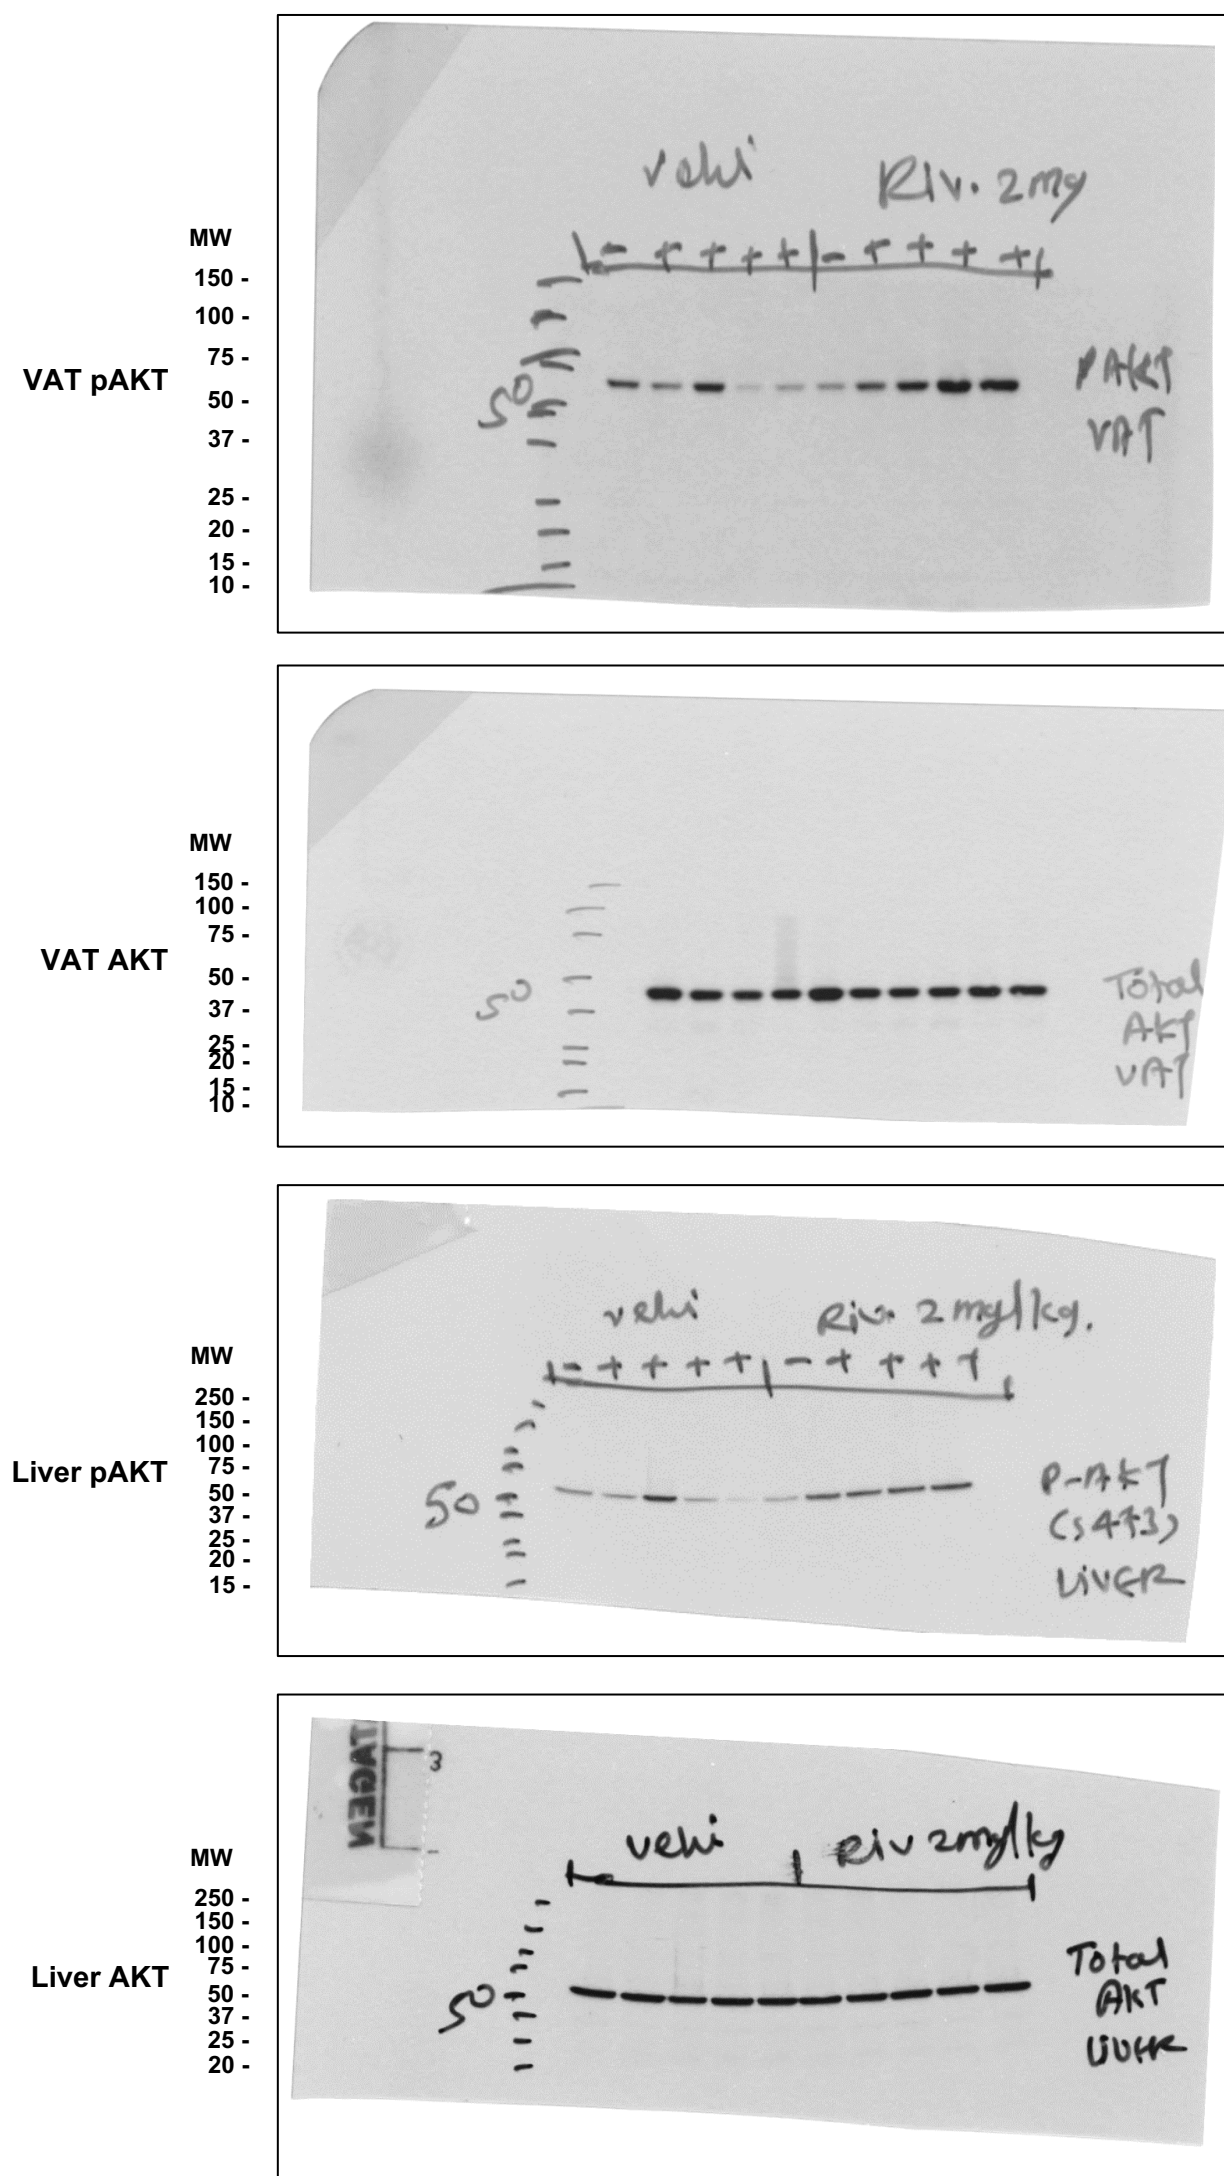

**Supplementary Figure 5**  
**Supplementary Figure to Figure 4a**

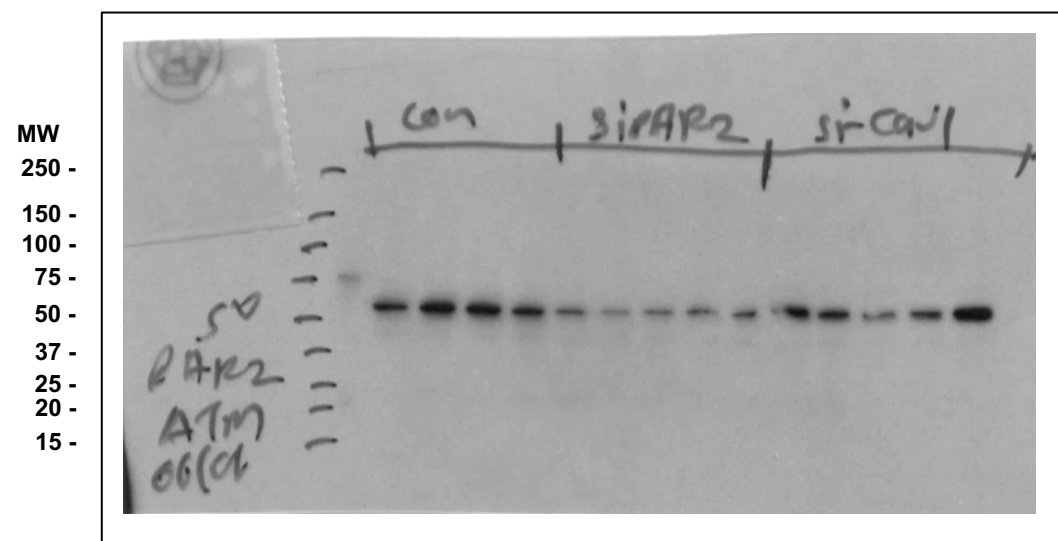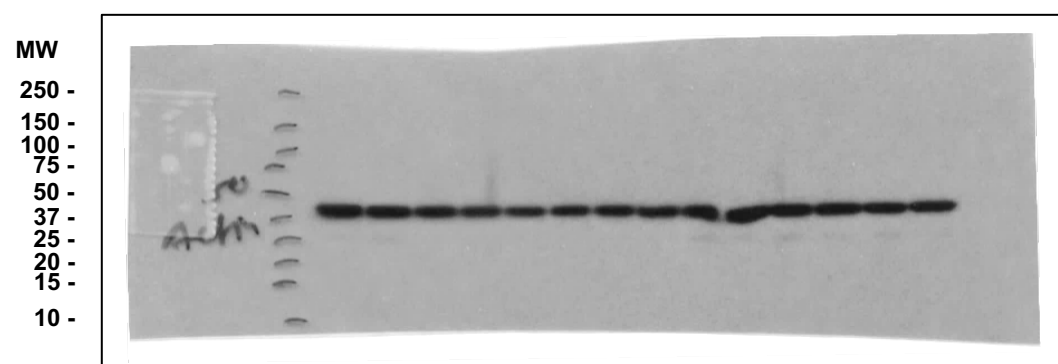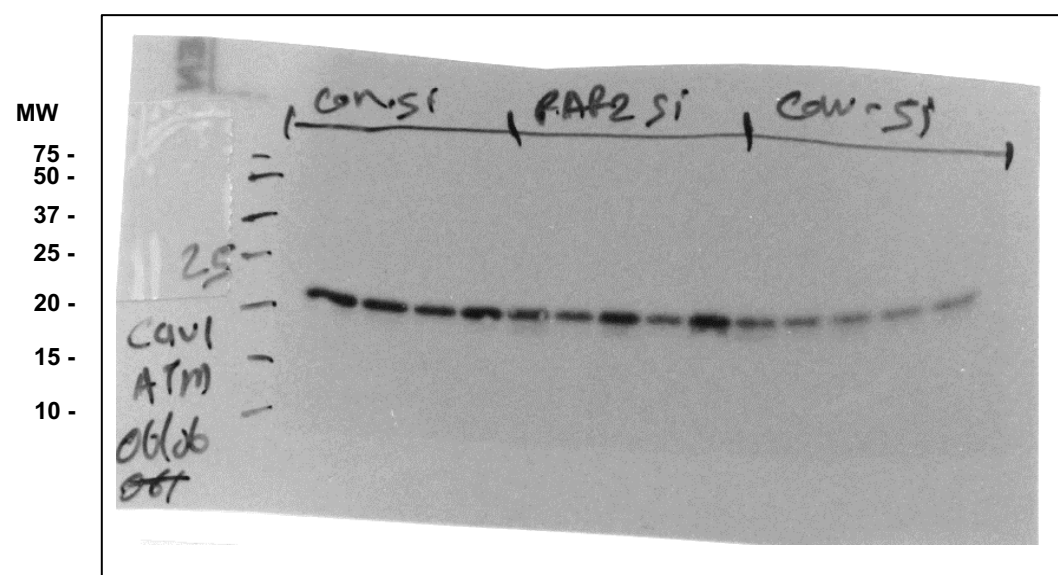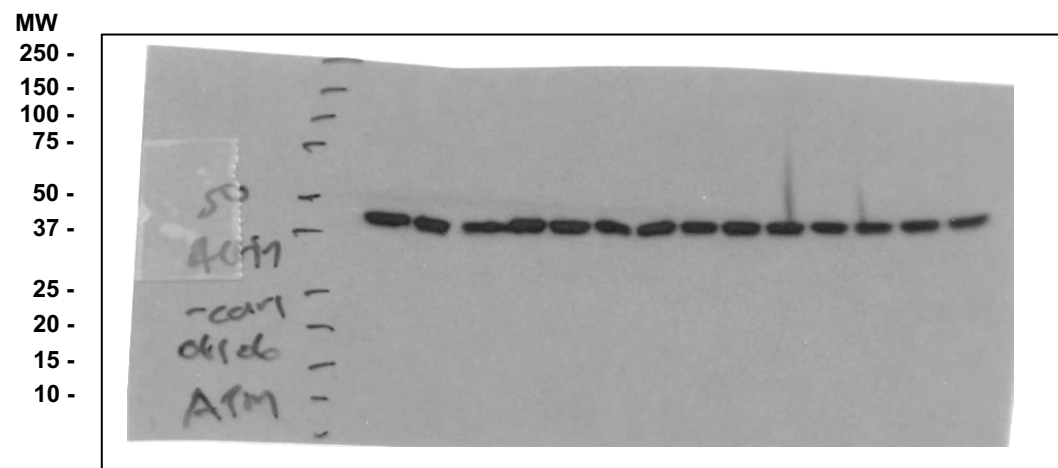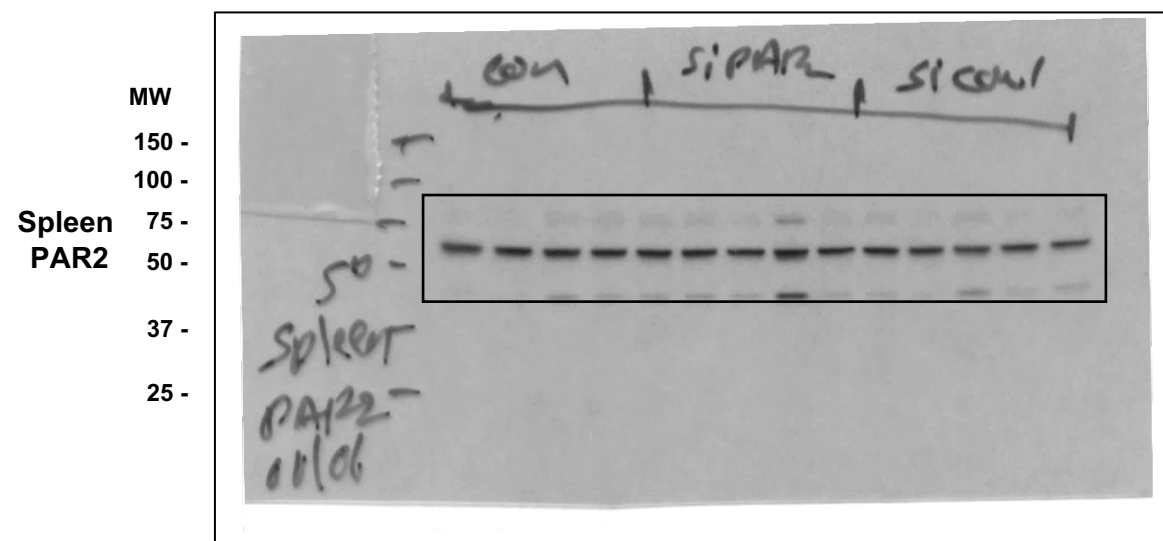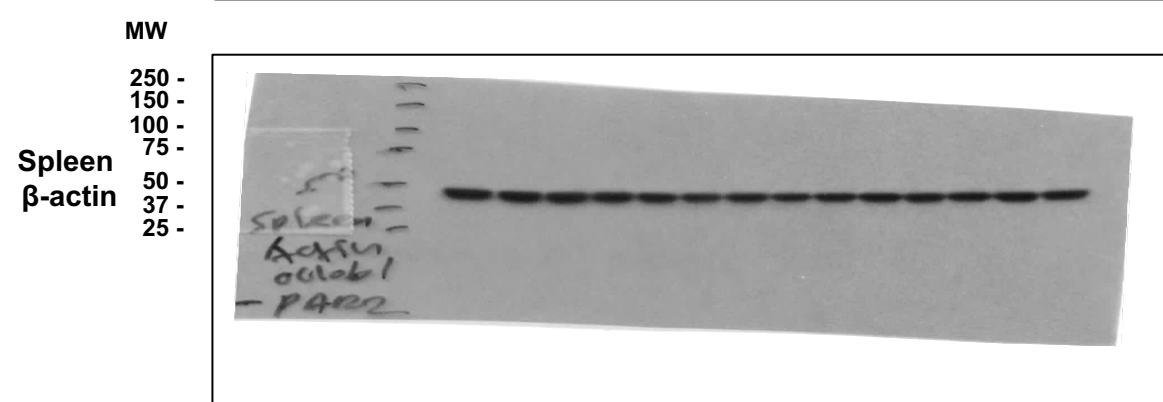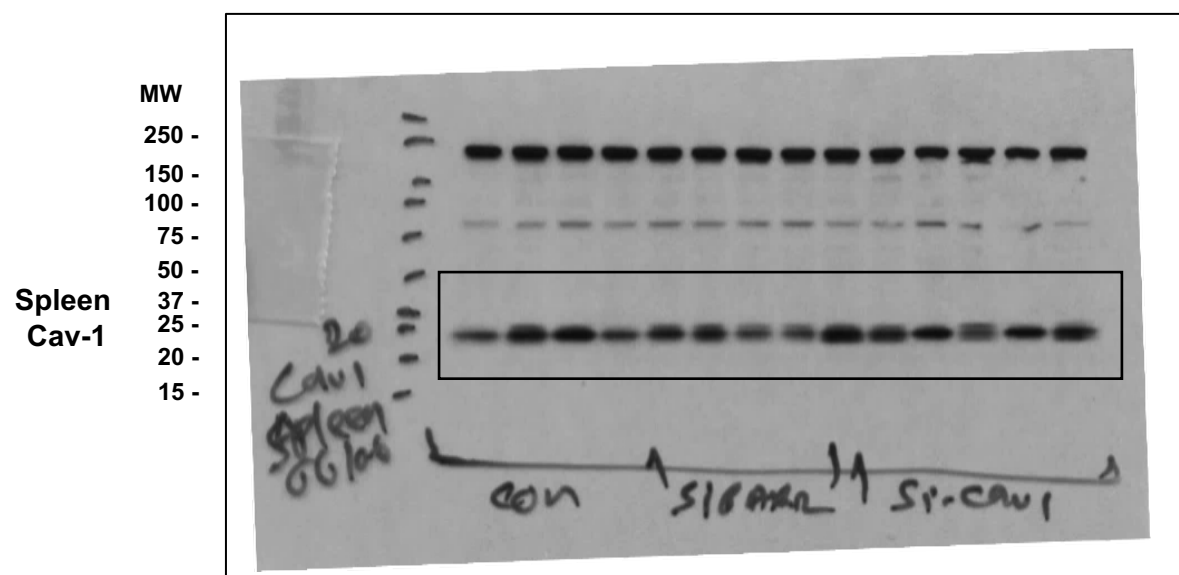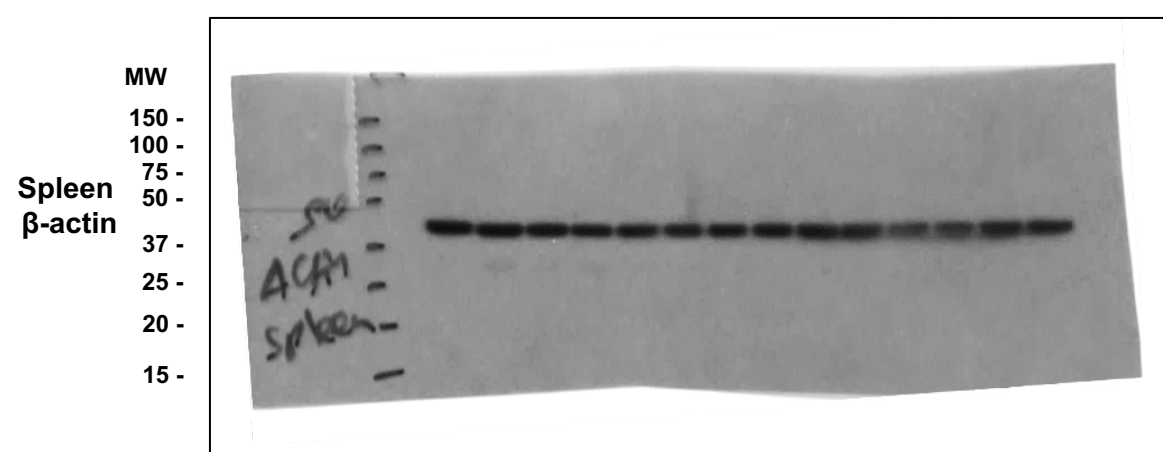

### Supplementary Figure 6 Supplementary Figure to Figure 4e

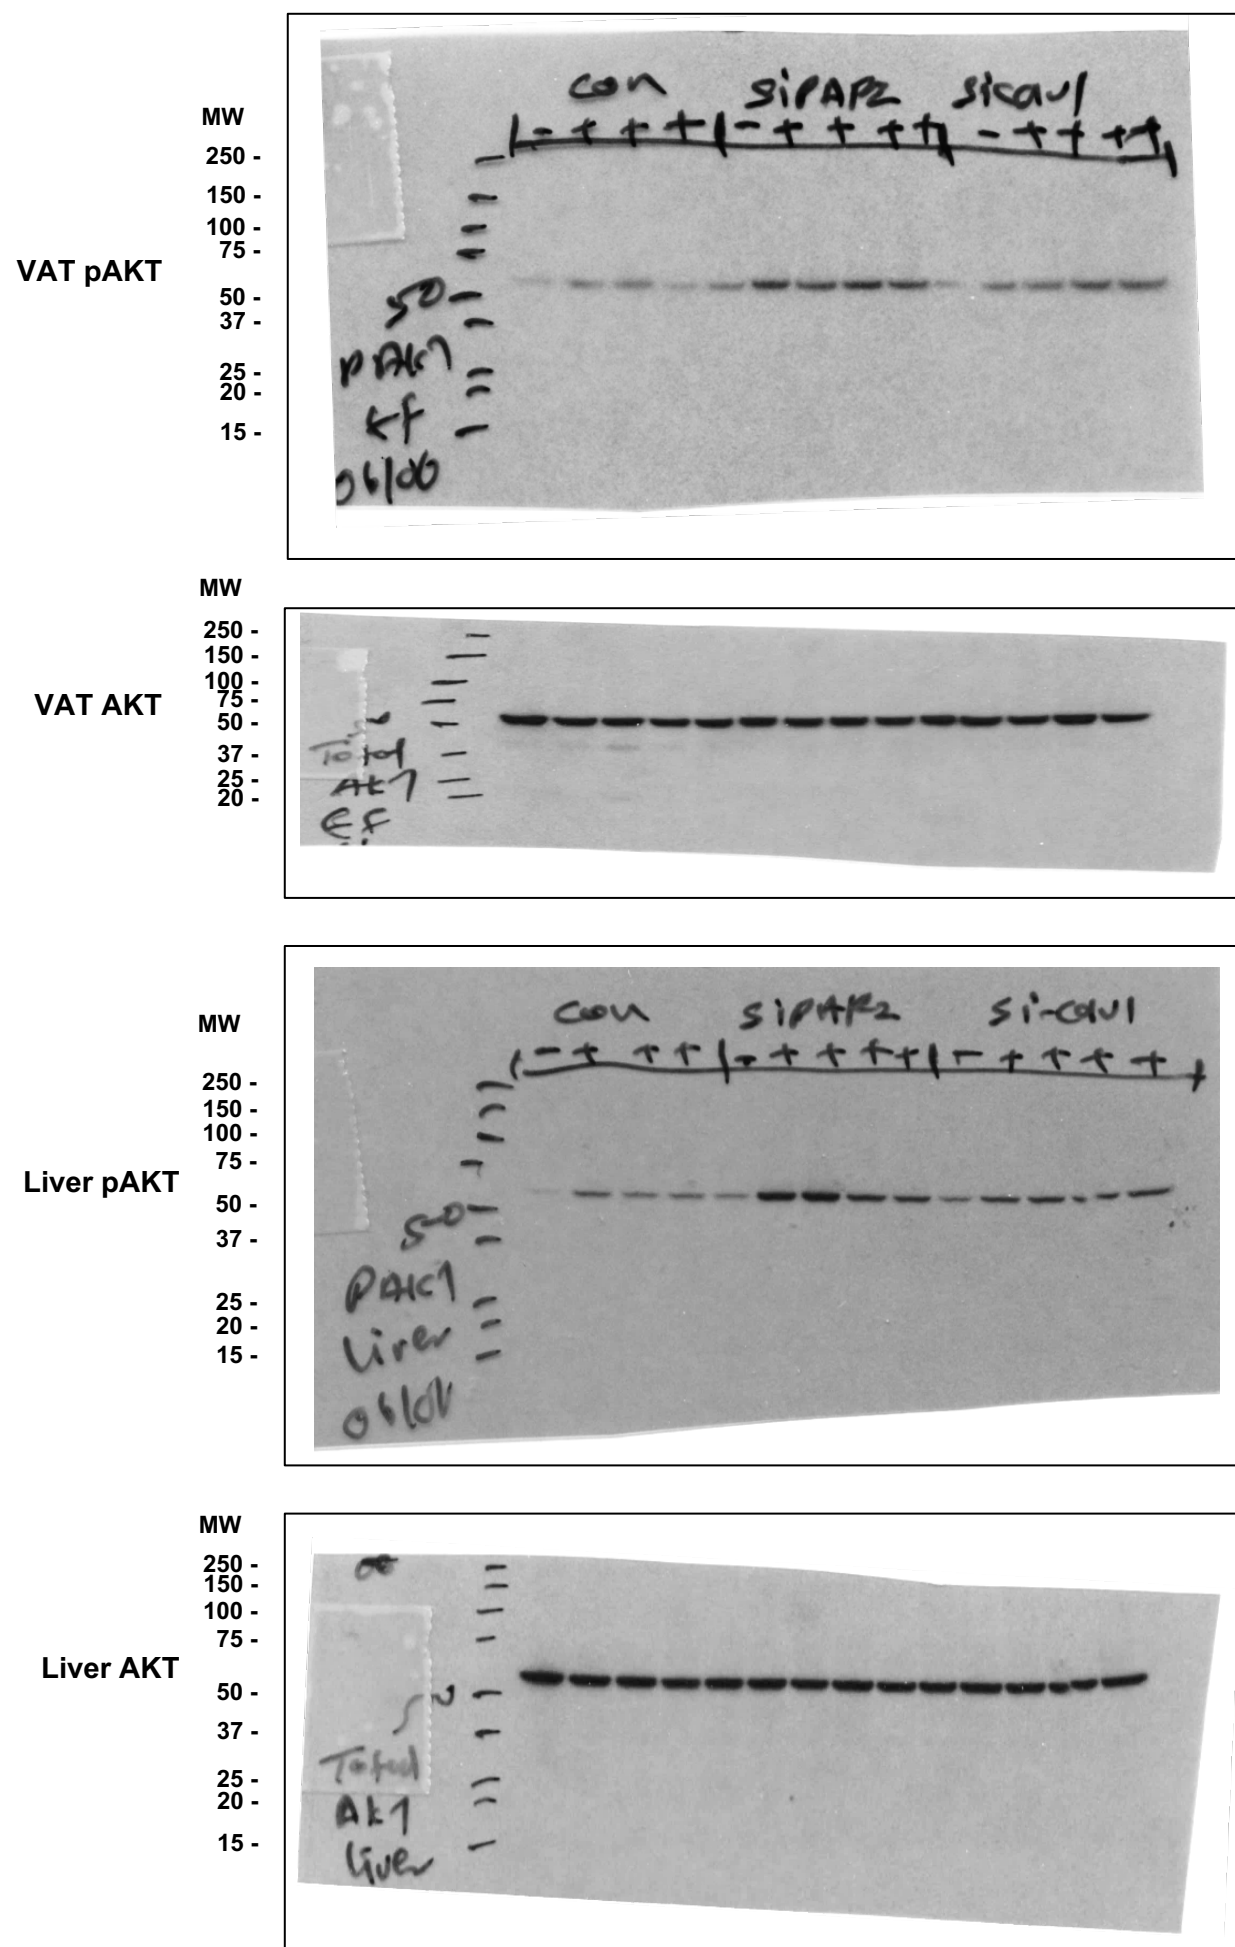

### Supplementary Figure 8 Supplementary Figure to Extended Data Figure 3a

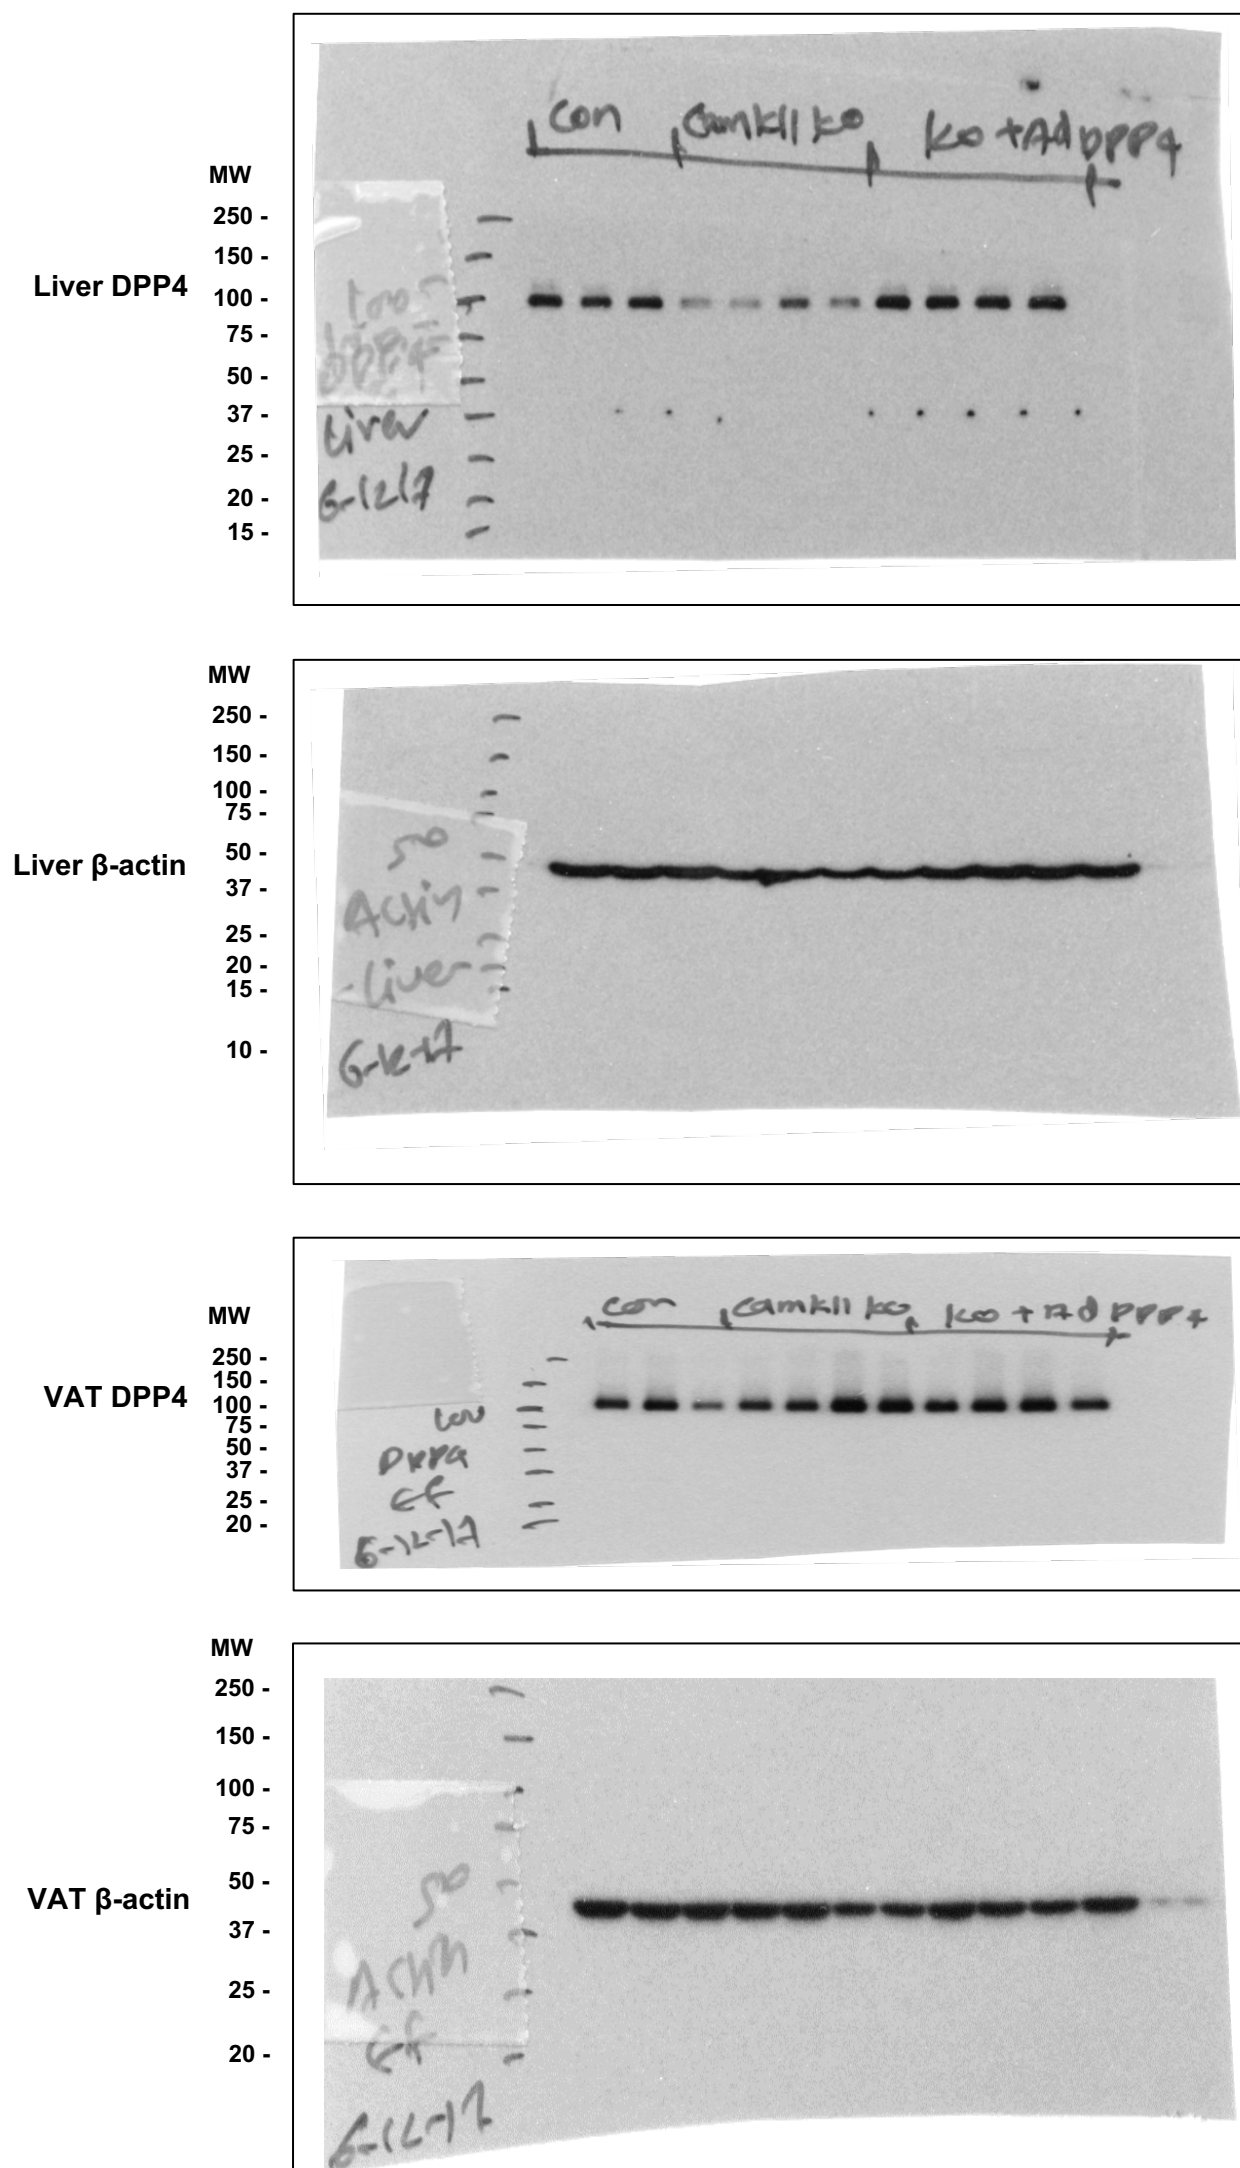

### Supplementary Figure 7 Supplementary Figure to Extended Data Figure 4a

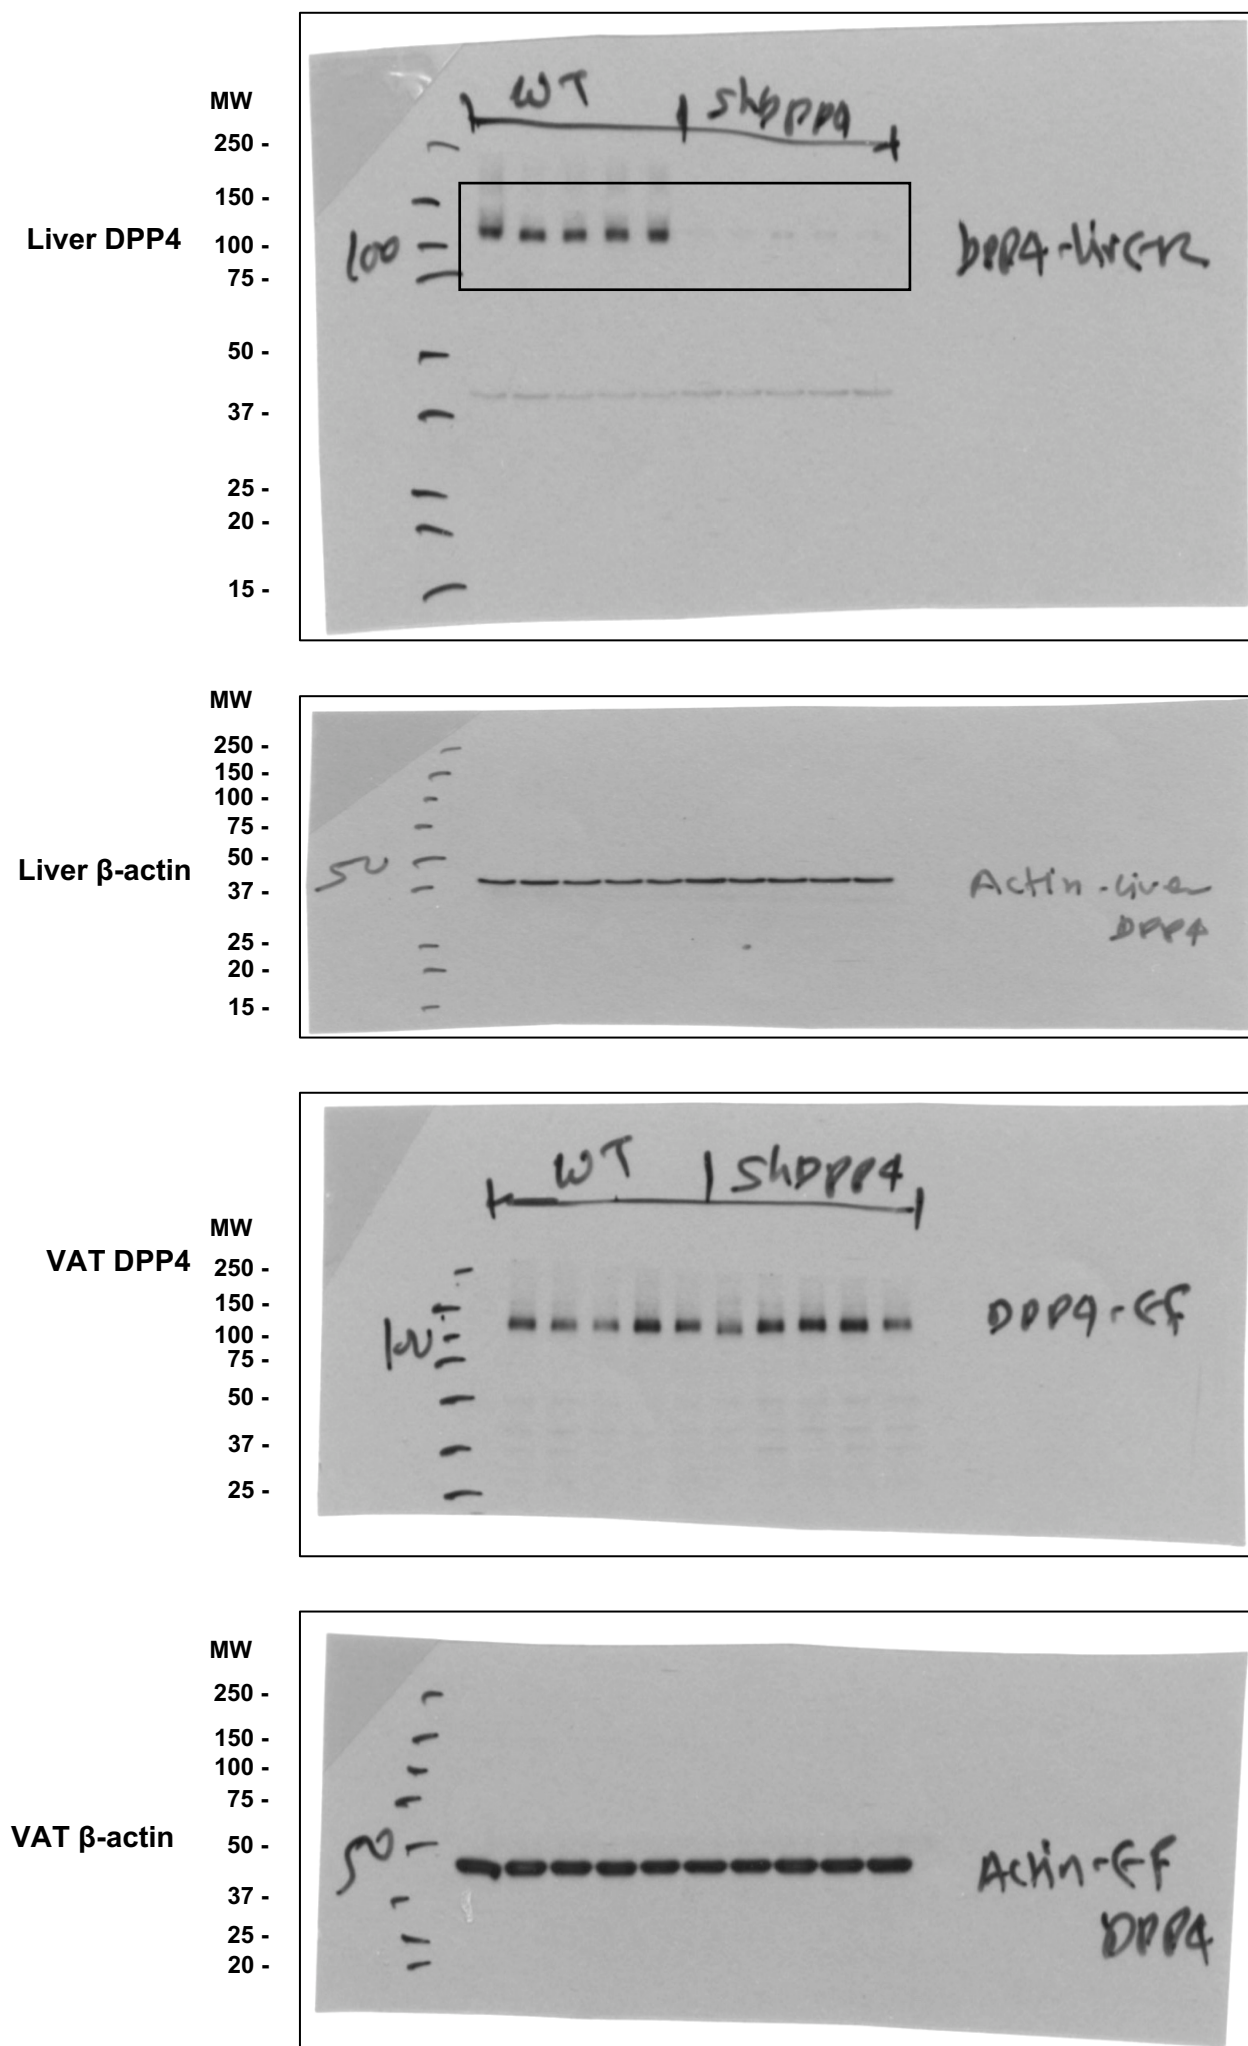



### Supplementary Figure 9 Supplementary Figure to Extended Data Figure 6e

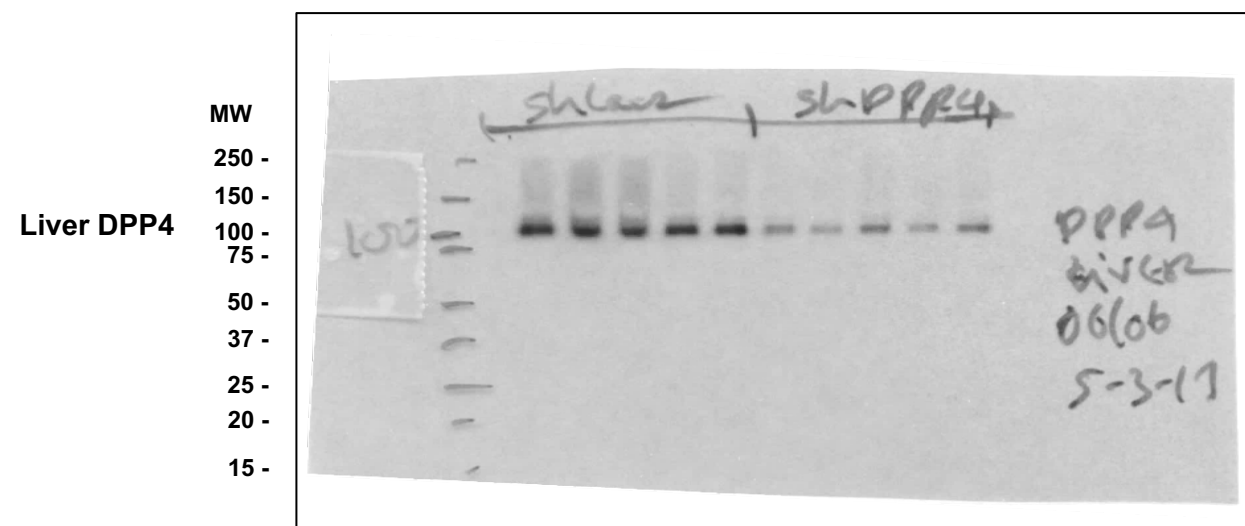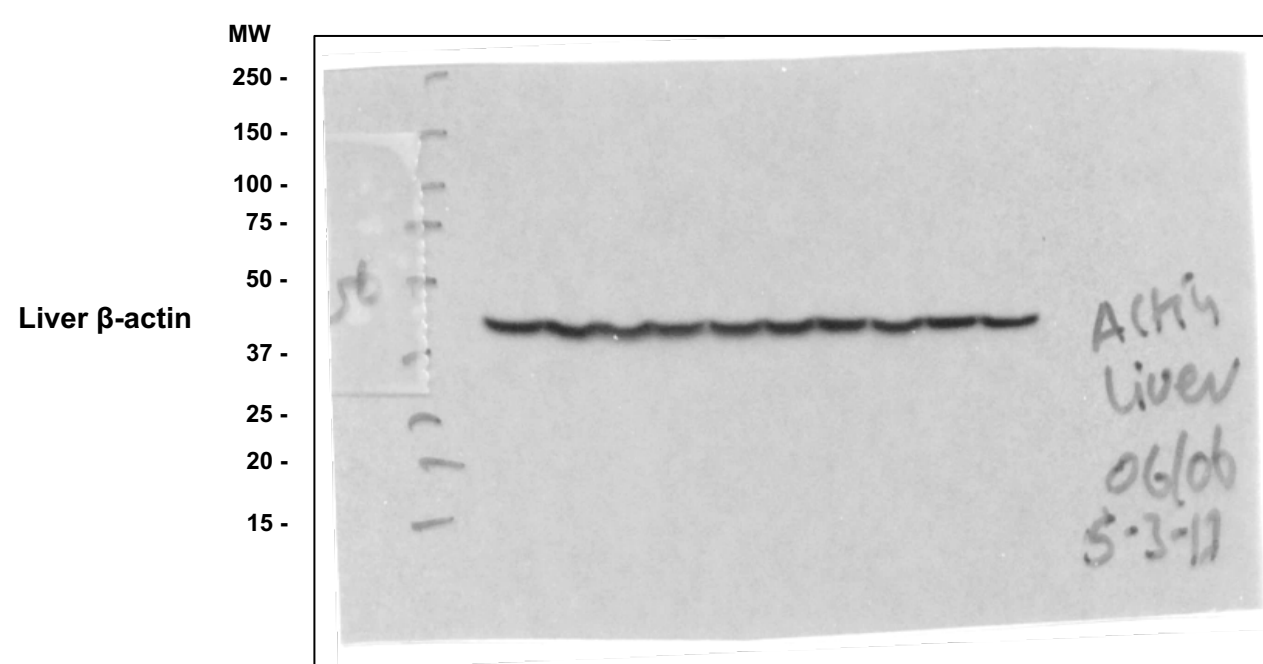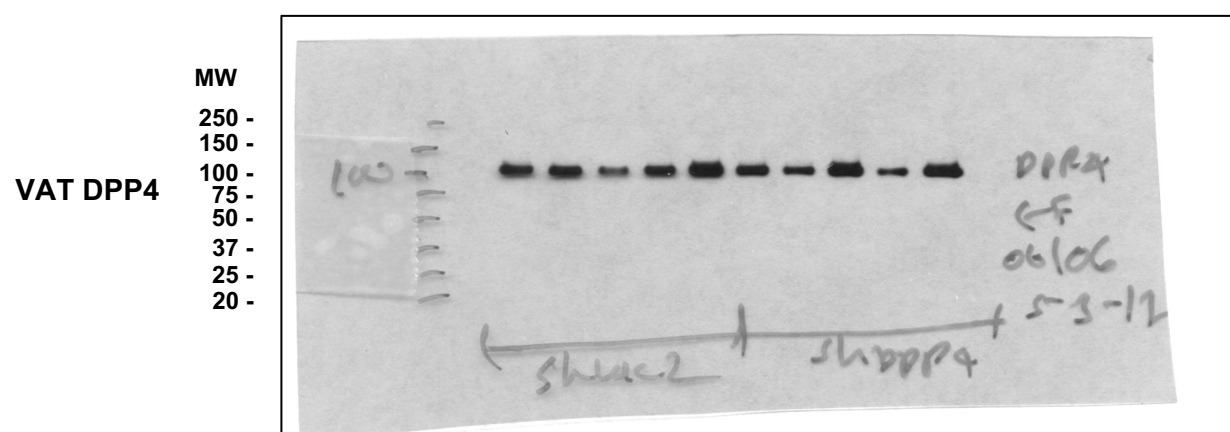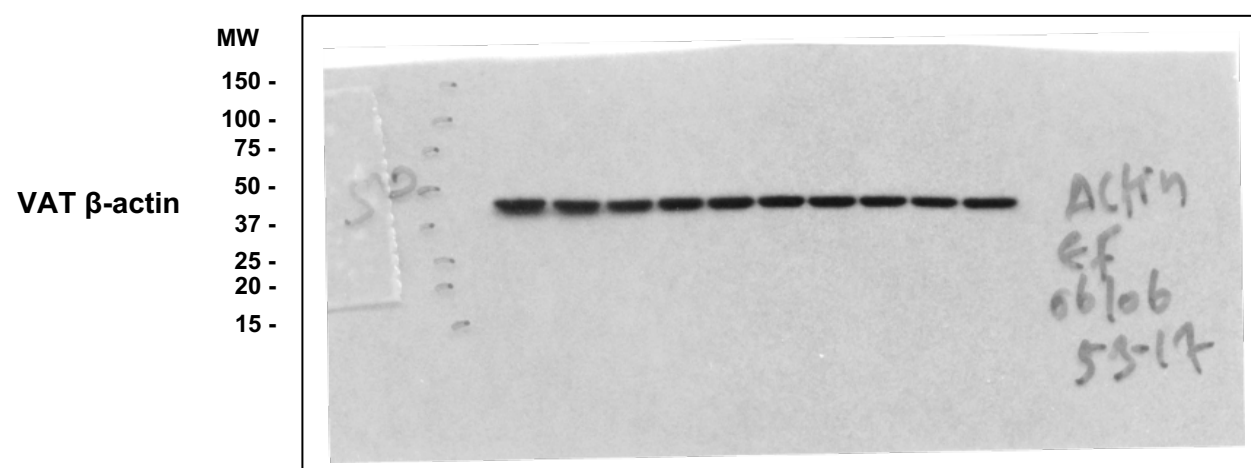

### Supplementary Figure 10 Supplementary Figure to Extended Data Figure 6i

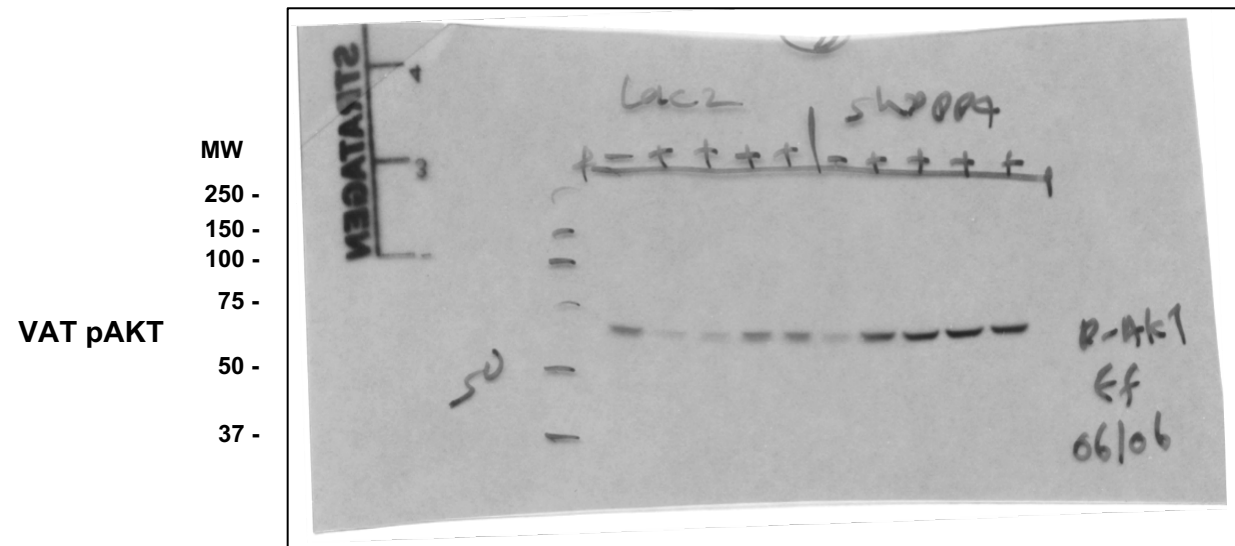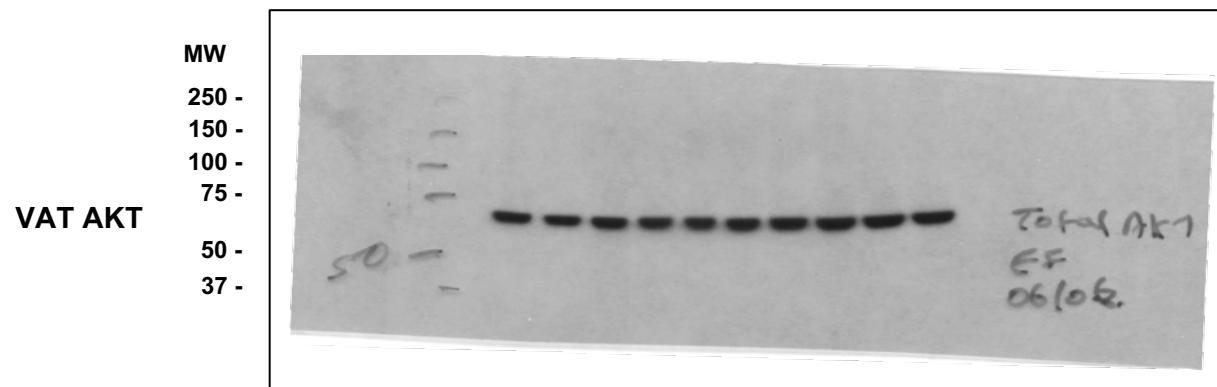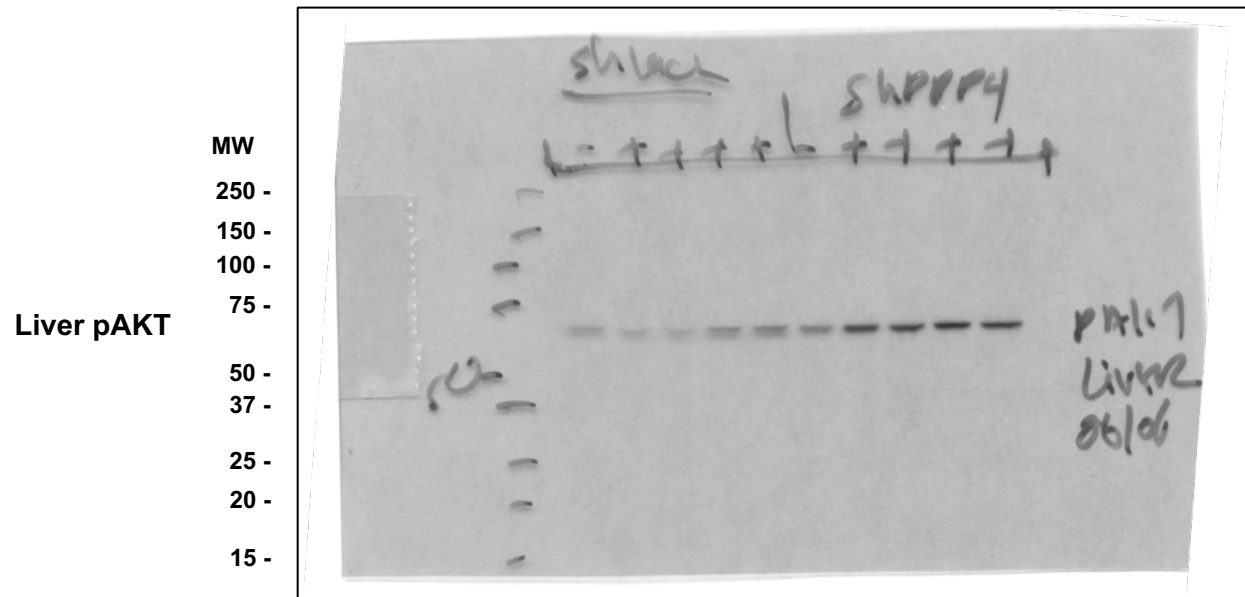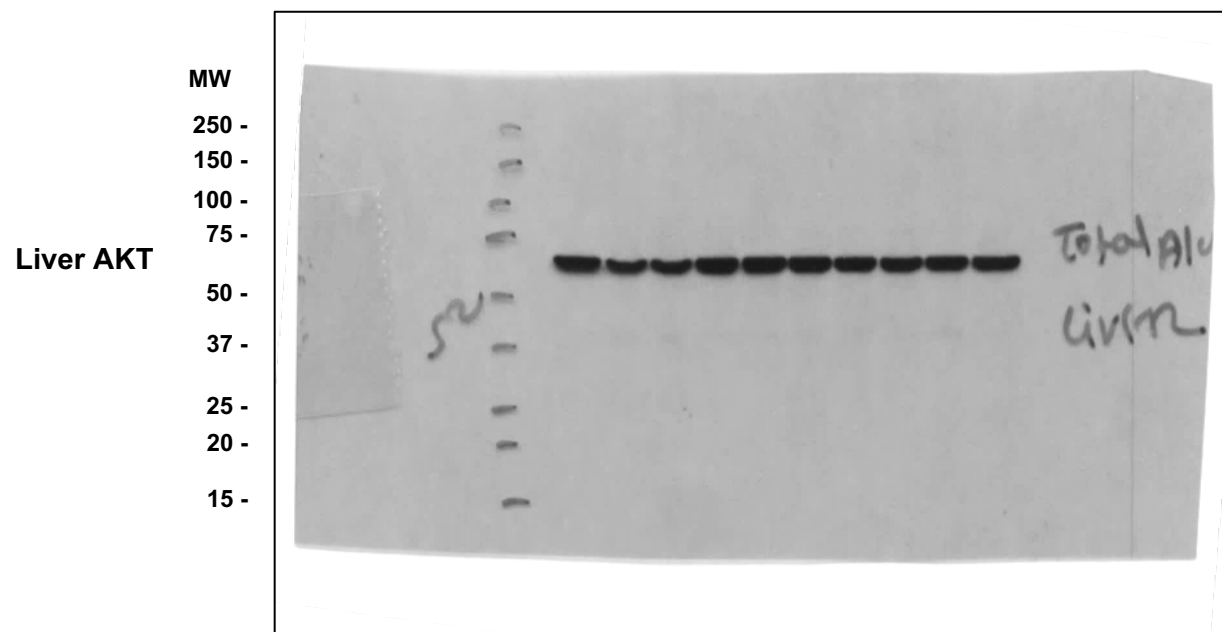

### Supplementary Figure 11 Supplementary Figure to Extended Data Figure 7b

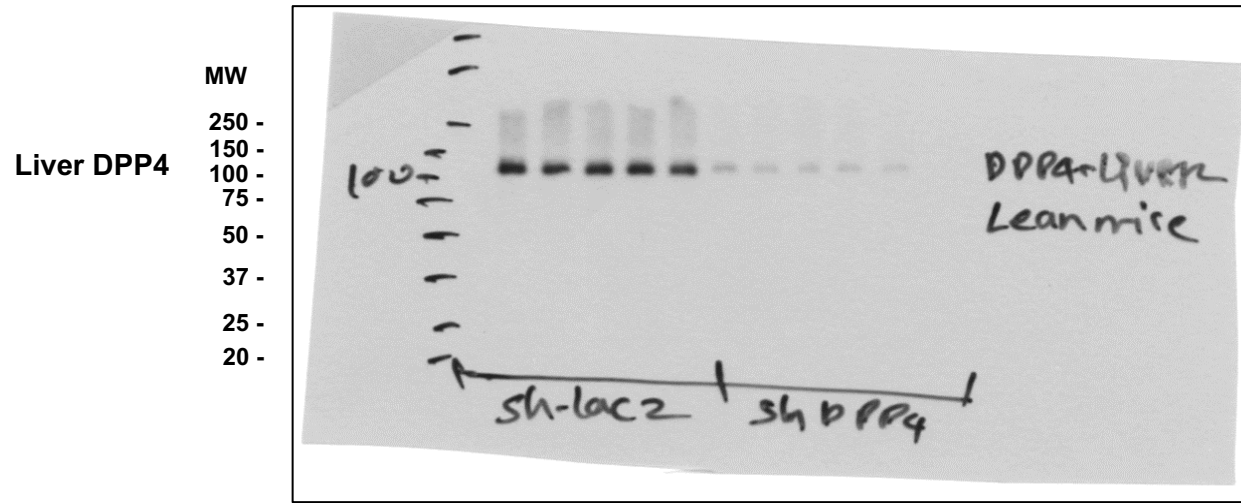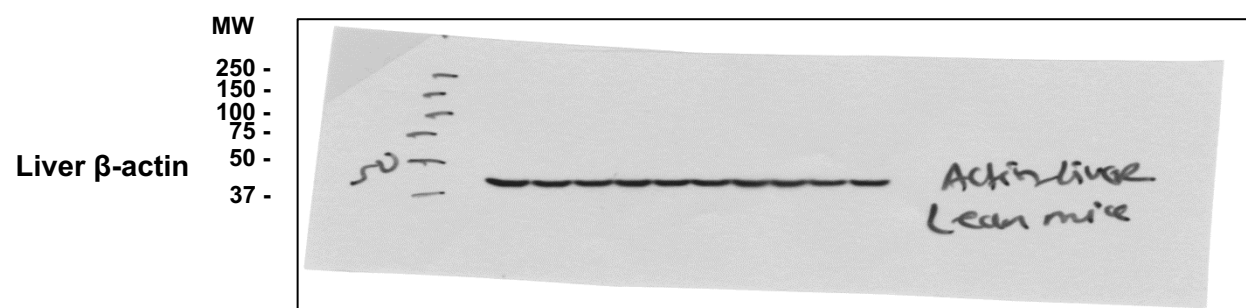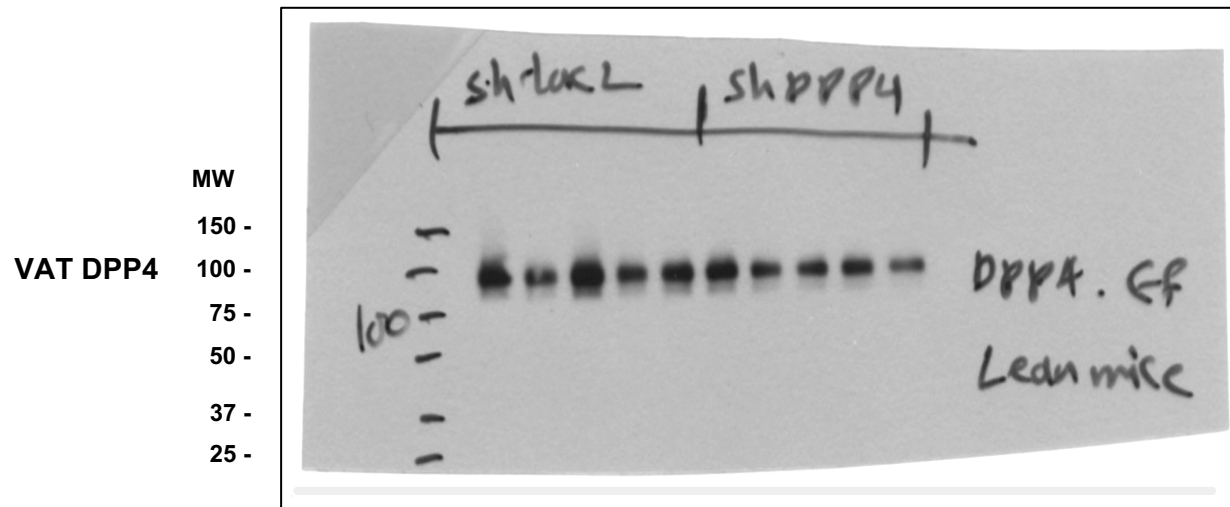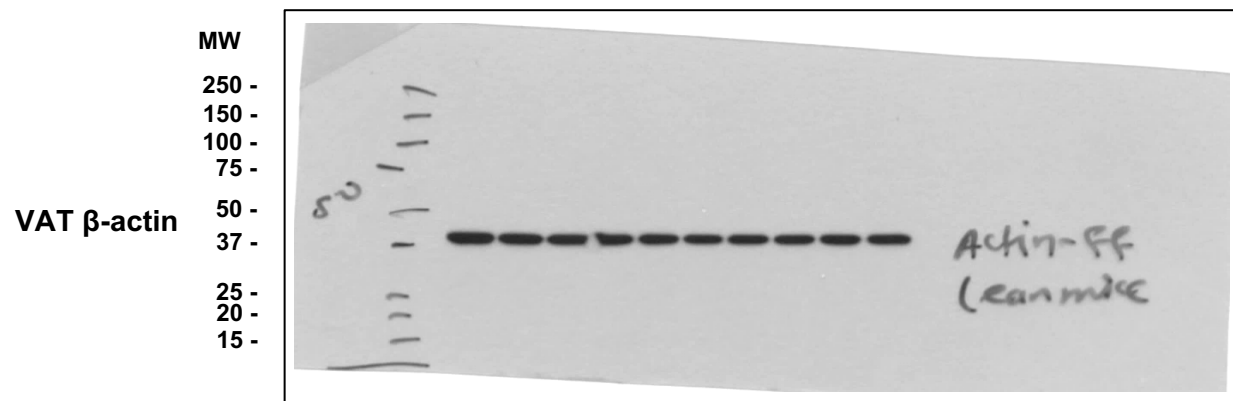

## Supplementary Figure 12

### Supplementary Figure to Extended Data Figure 7c

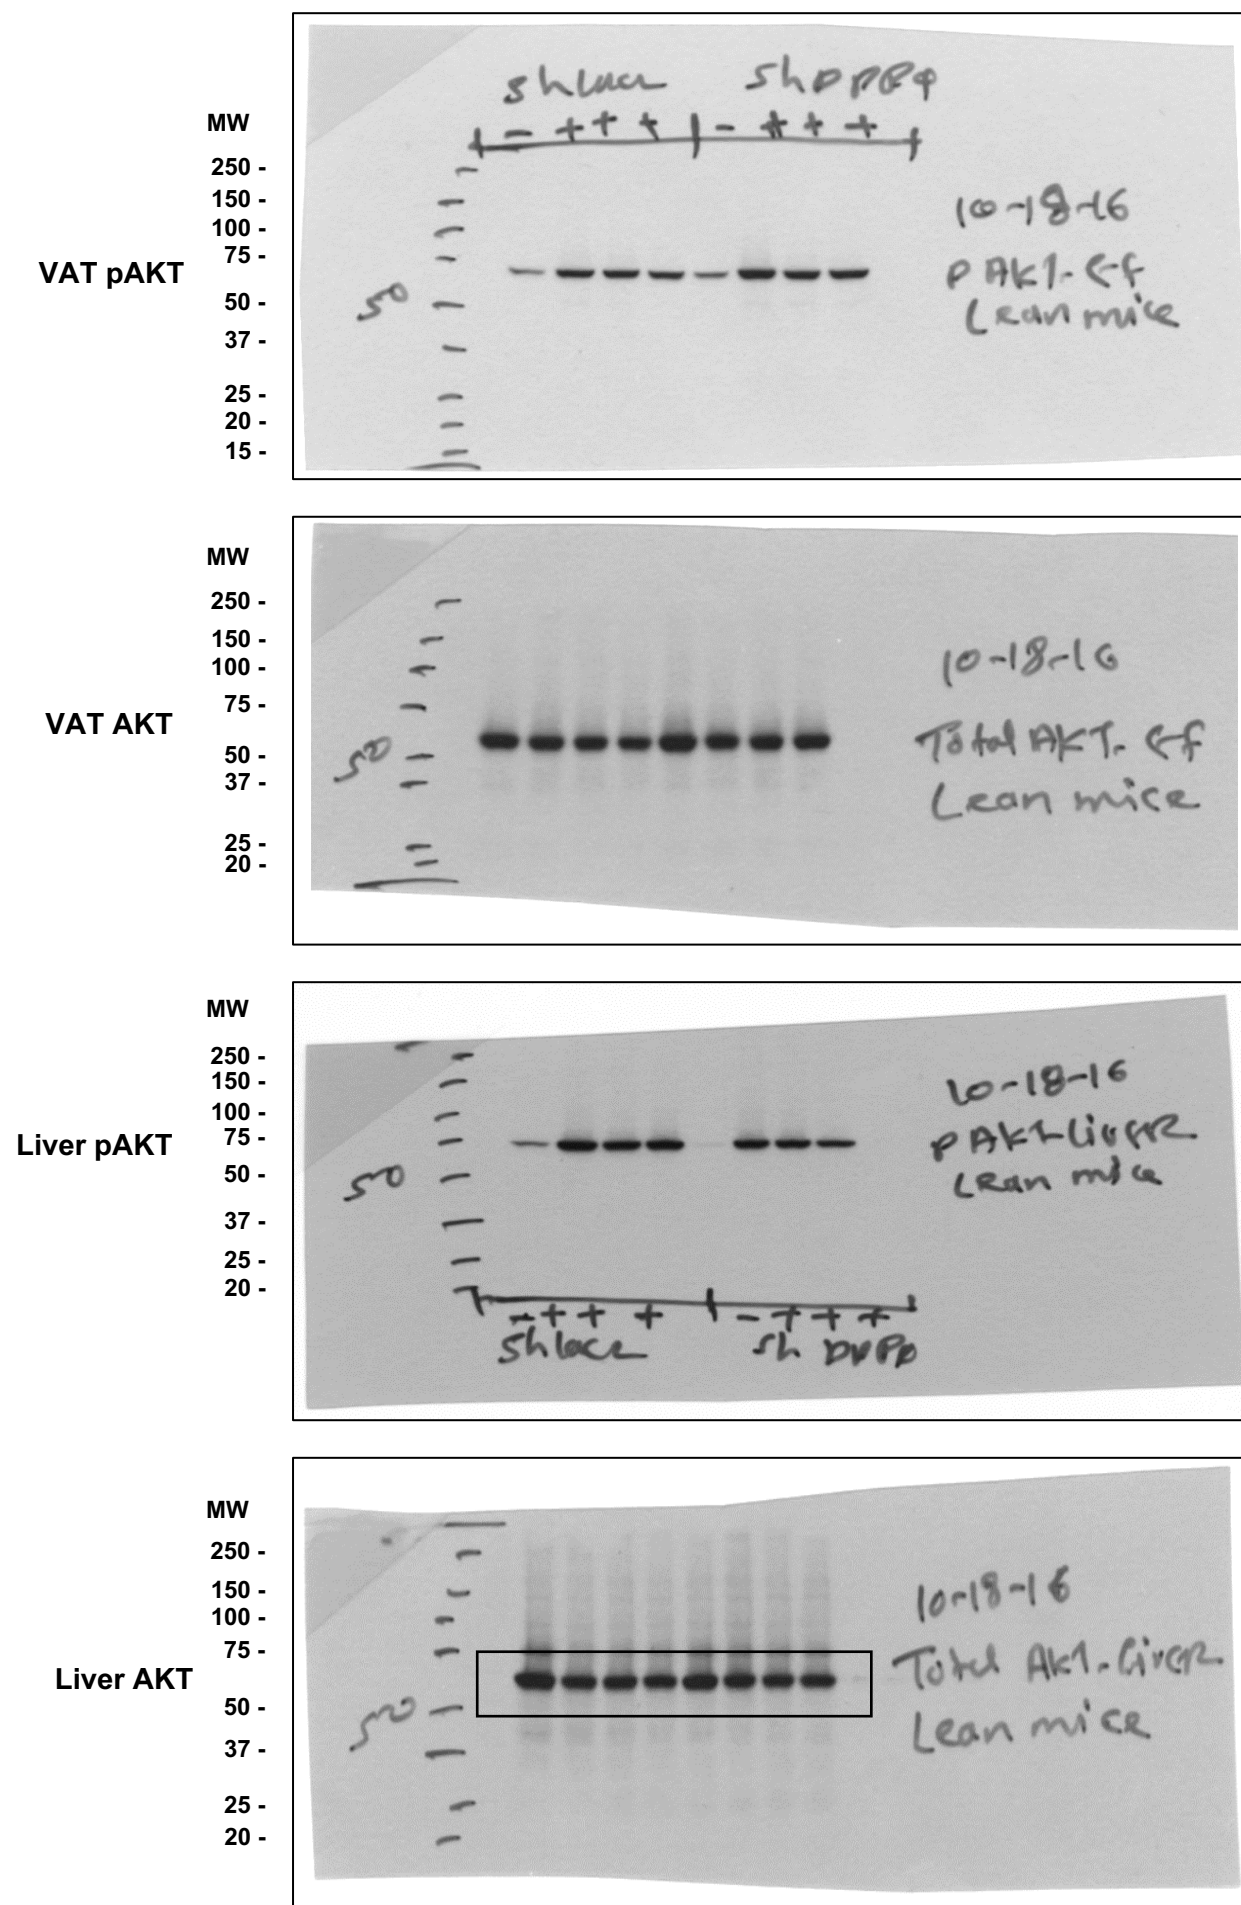

**Supplementary Figure 13**  
**Supplementary Figure to Extended Data Figure 7g**

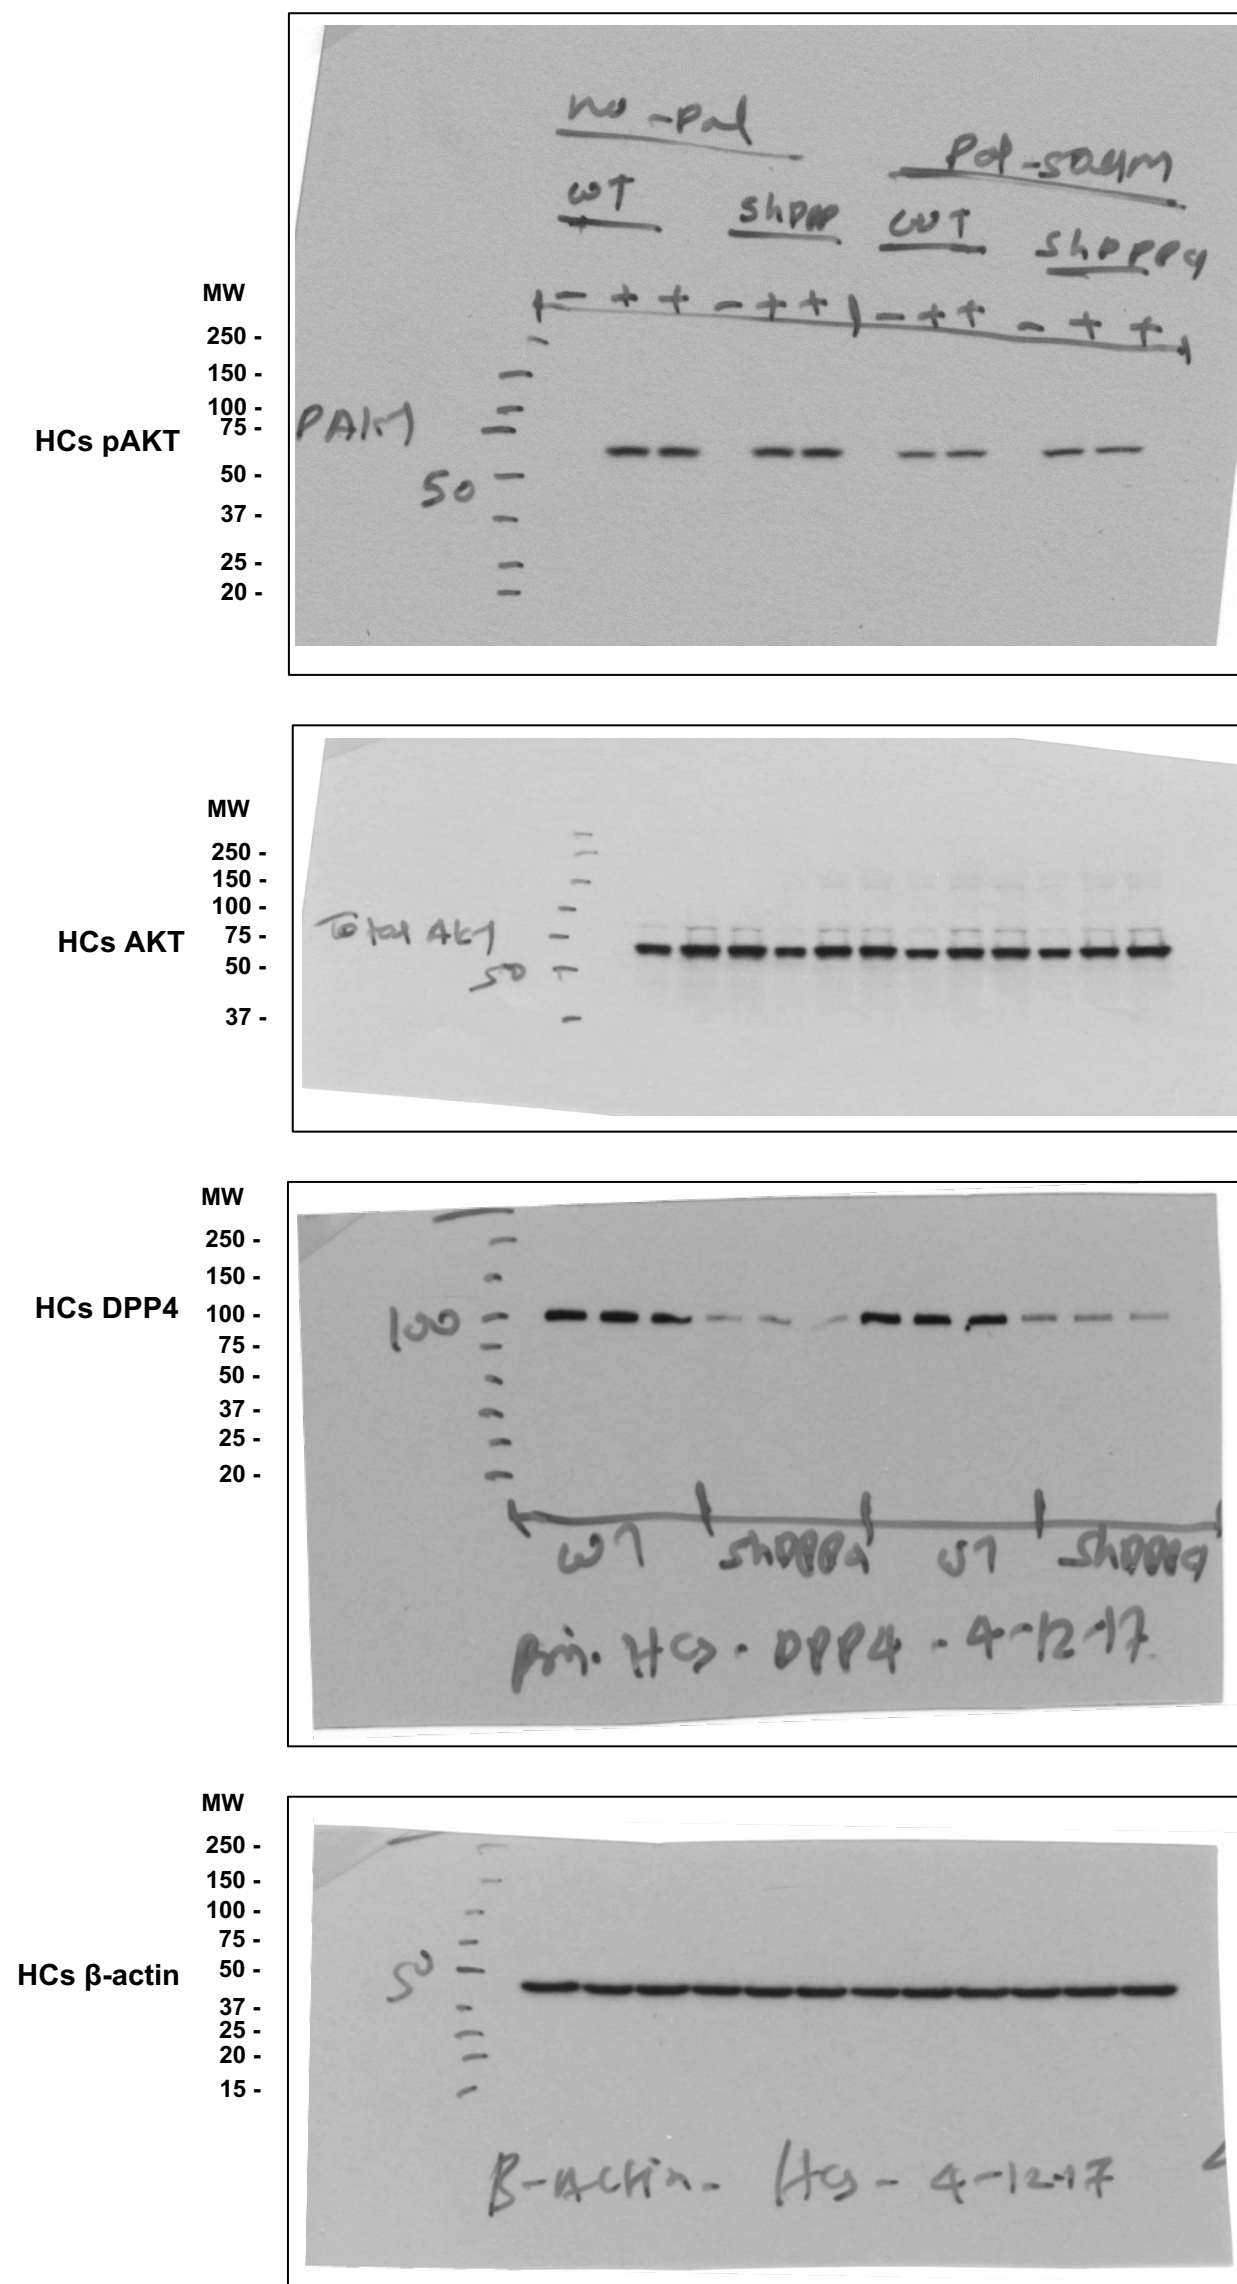

## Supplementary Figure 14

### Supplementary Figure to Extended Data Figure 10b

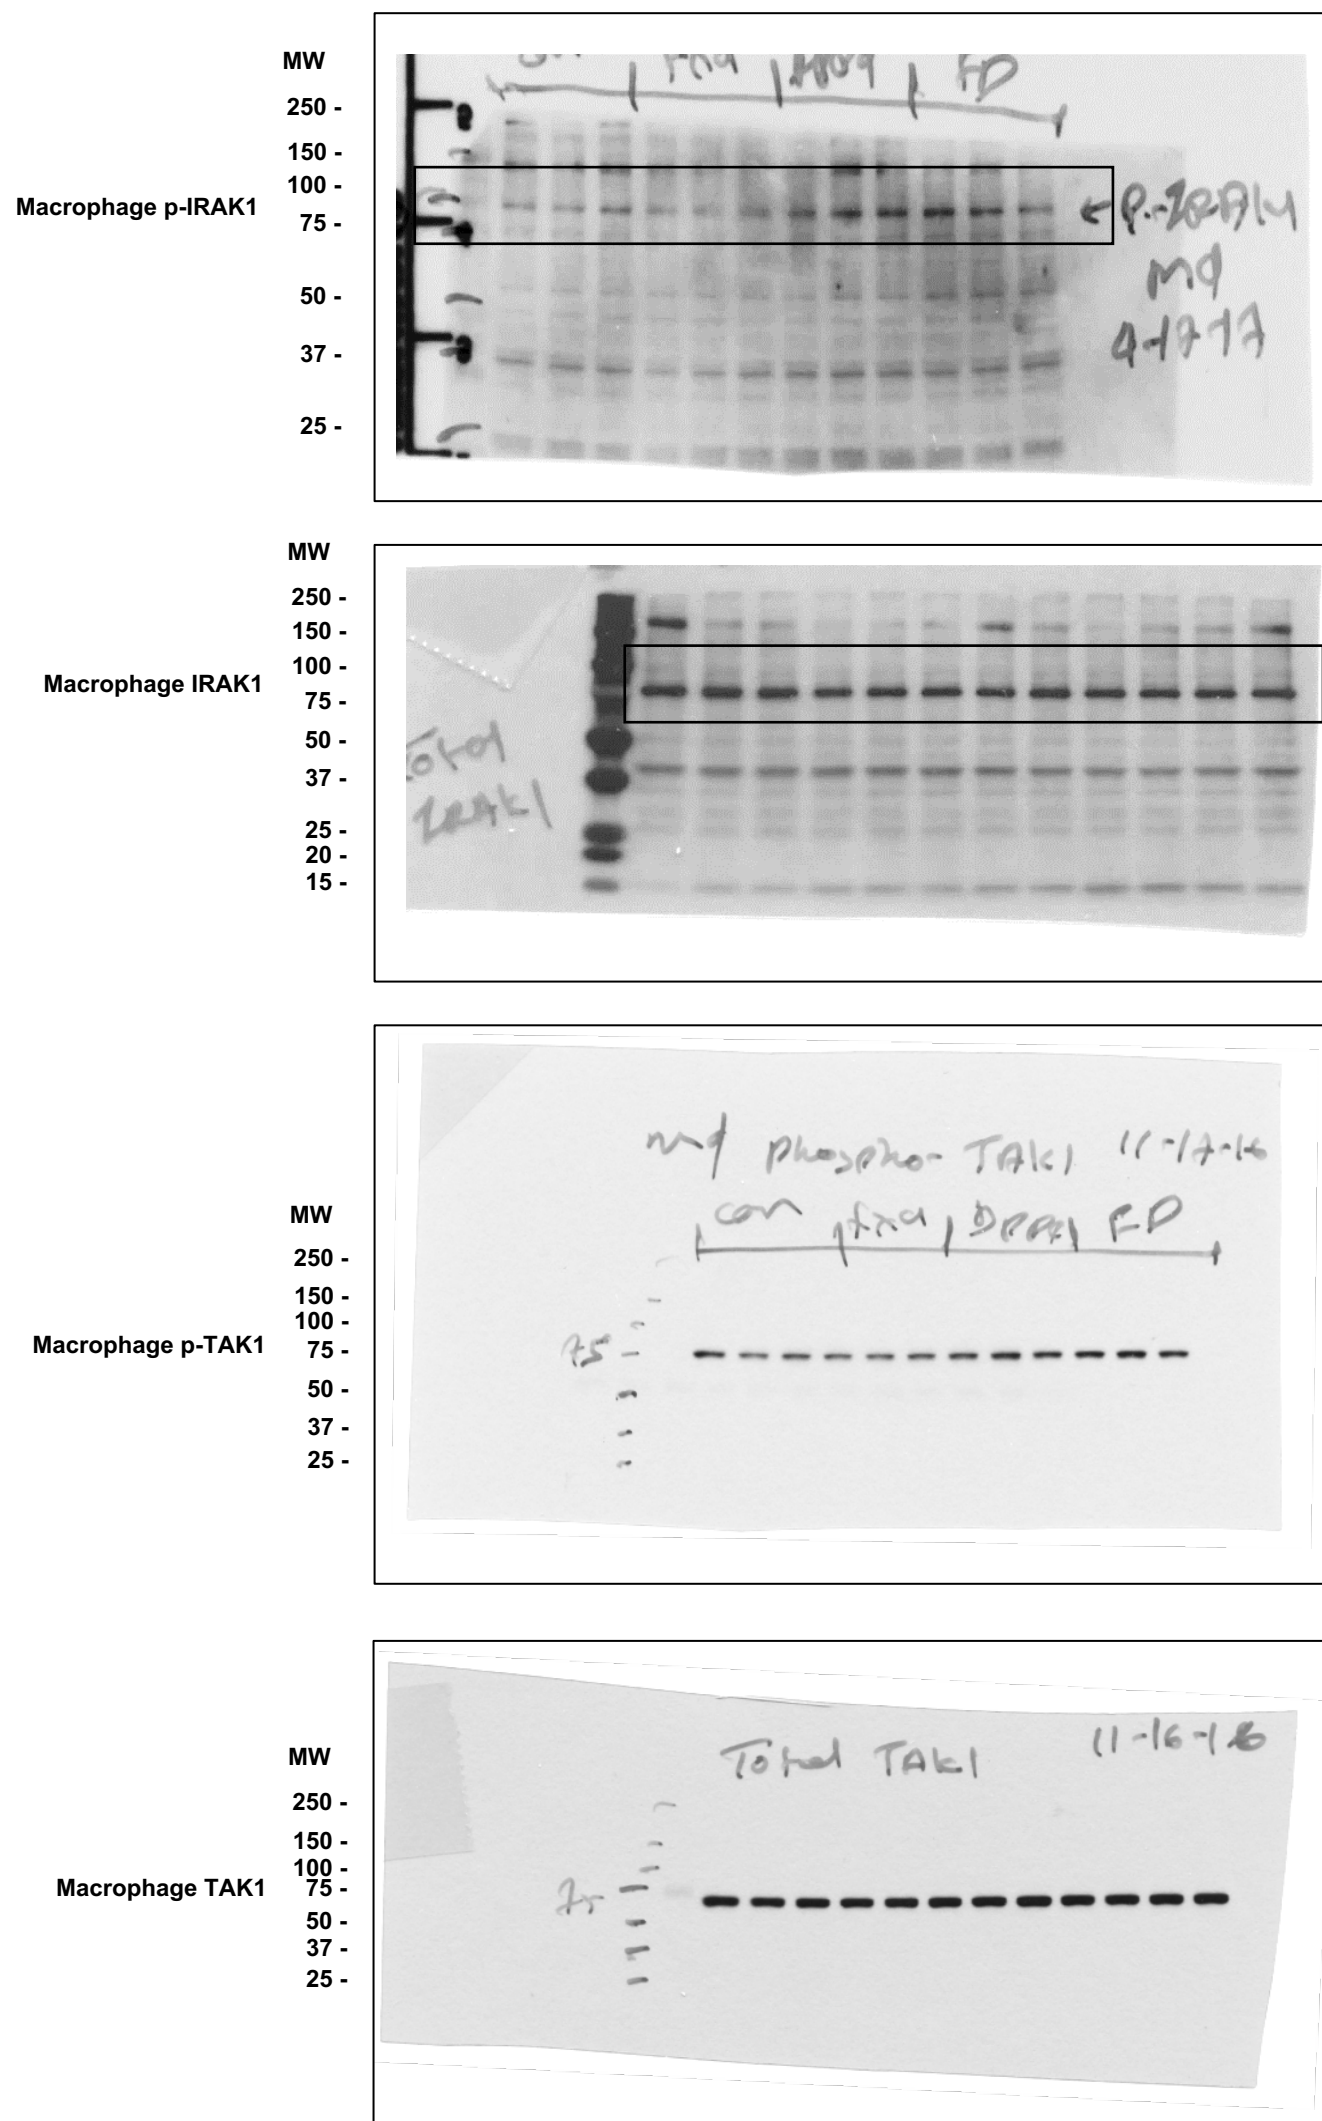

### Supplementary Figure 15 Supplementary Figure to Extended Data Figure 10c

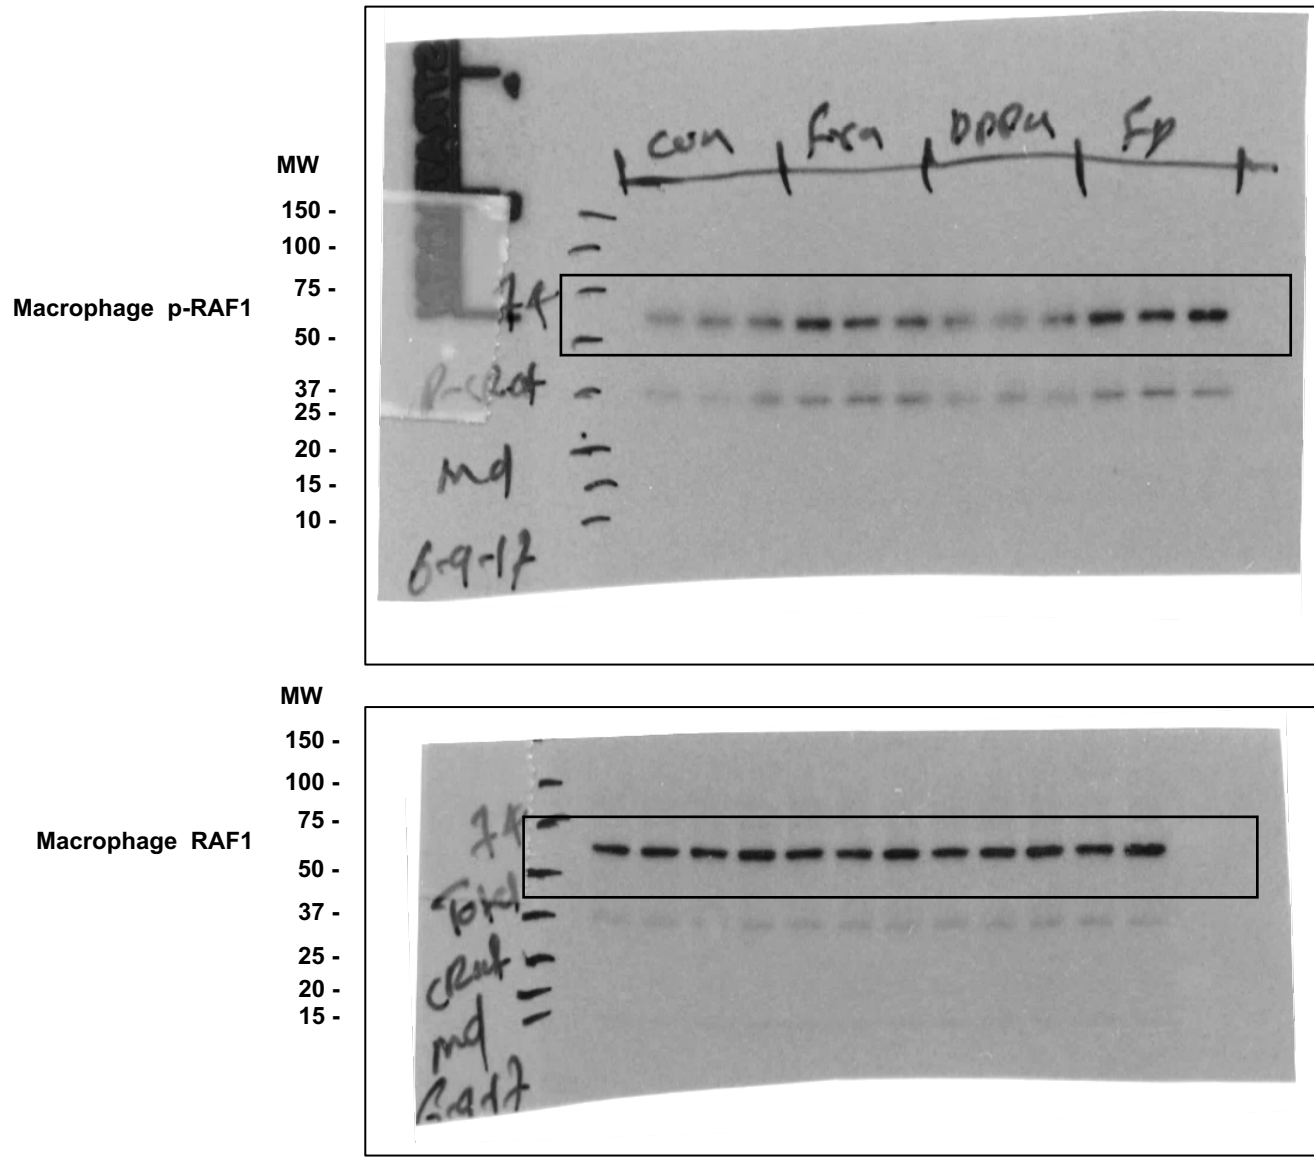

## Supplementary Figure 16

### Supplementary Figure to Extended Data Figure 10d

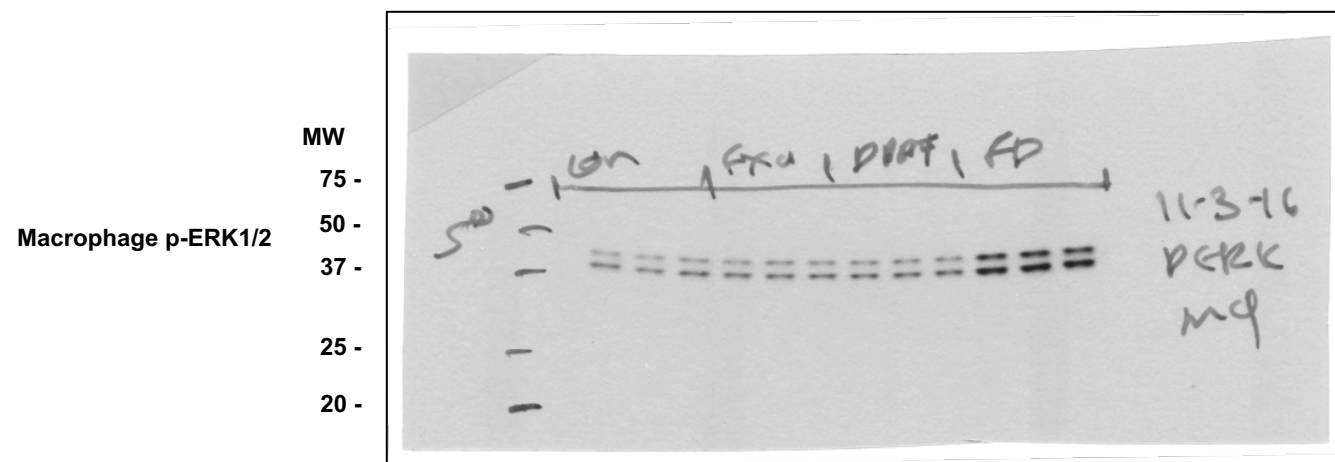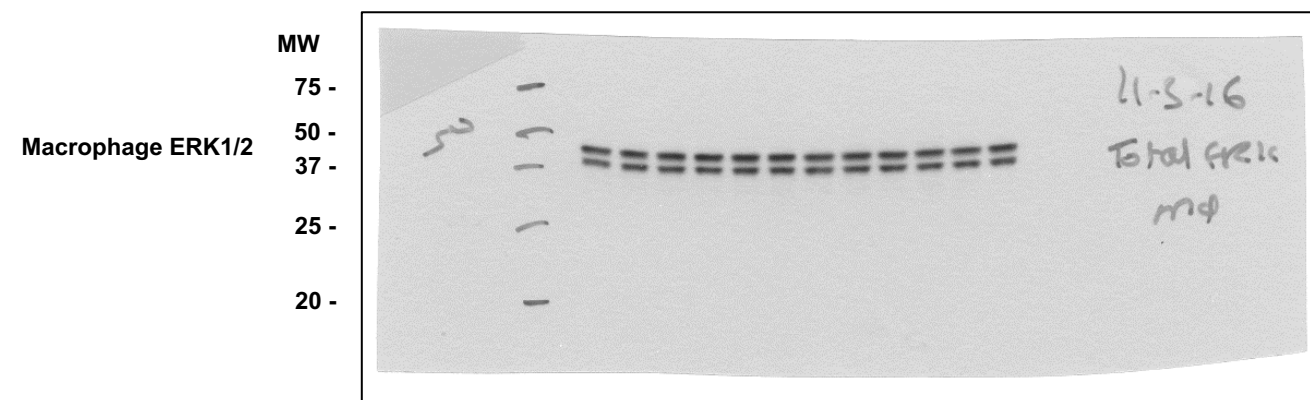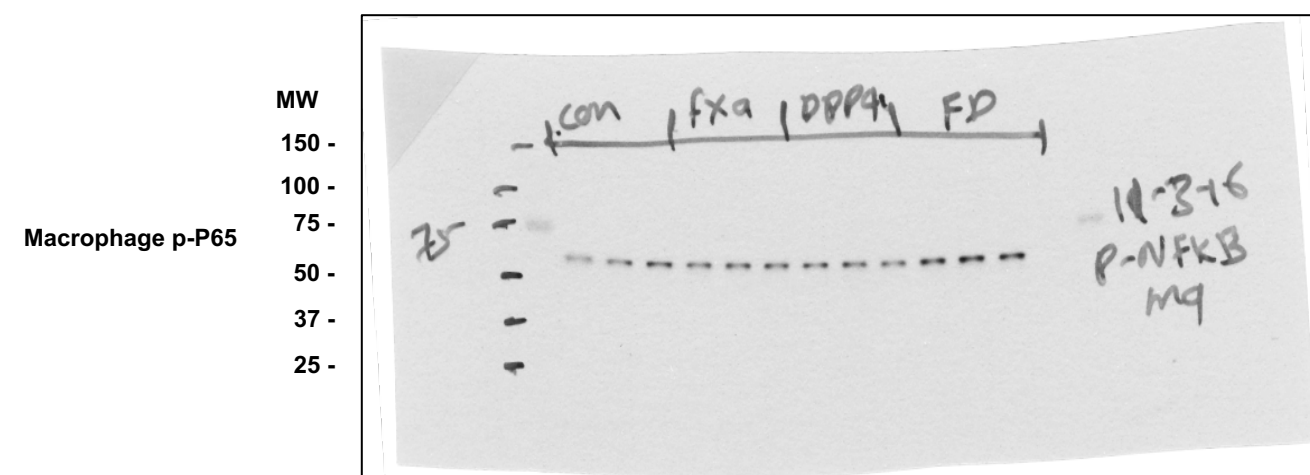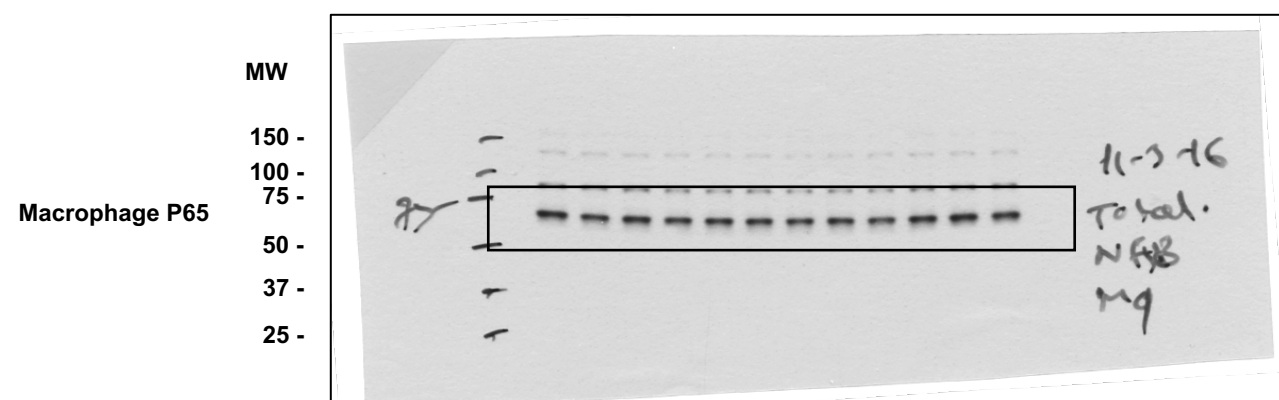

Supplement: NIHMS975435-supplement-S2.pdf [file NIHMS975435-supplement-S2.pdf]
