# Supplementary material
Source: PubMed Central journal article supplement (PMC6021131)
Supplement: NIHMS975435-supplement-S3.pdf [file NIHMS975435-supplement-S3.pdf]

## Supplementary information

**Supplementary Table 1: Gene primers used for RT-qPCR.**

| Genes                       | Primer sequences         |
|-----------------------------|--------------------------|
| m36b4 F                     | GCTCCAAGCAGATGCAGCA      |
| m36b4 R                     | CCGGATGTGAGGCAGCAG       |
| mCcl2 F                     | TTAAAAACCTGGATCGGAACCAA  |
| mCcl2 R                     | GCATTAGCTTCAGATTTACGGGT  |
| mDpp4 F                     | ACCGTGGAAGGTTCTTCTGG     |
| mDpp4 R                     | CACAAAGAGTAGGACTTGACCC   |
| mF480 ( <i>Adgre1</i> ) F   | ACCACAATACCTACATGCACC    |
| mF480 ( <i>Adgre1</i> ) R   | AAGCAGGCGAGGAAAAGATAG    |
| mTnfa F                     | TATGGCTCAGGGTCCAACCTC    |
| mTnfa R                     | CTCCCTTTGCAGAACTCAGG     |
| mIl6 F                      | AGTTGCCTTCTTGGGACTGA     |
| mIl6 R                      | CAGAATTGCCATTGCACAAC     |
| mIl1b F                     | GCCCATCCTCTGTGACTCAT     |
| mIl1b R                     | AGGCCACAGGTATTTTGTCG     |
| mDpp4 exon 1 F              | CATGTGCATGCGCCTTAGTC     |
| mDpp4 exon 1 R              | GTTCACCTTGCTTTGCCGGAG    |
| mDpp4 non-specific region F | GGGTCTTATGCCTGTGCCTT     |
| mDpp4 non-specific region r | TCAGTAGAGCGAAGGGGTCA     |
| hHPRT F                     | CAAGCTTGCTGGTGAAAAGGAC   |
| hHPRT R                     | GTCAAGGGCATATCCTACAACAAA |
| hCCL2 F                     | ACTGAAGCTCGTACTCTC       |
| hCCL2 R                     | CTTGGGTTGTGGAGTGAG       |
| hIL6 F                      | ACTCACCTTTCAGAACGAATTG   |
| hIL6R                       | CCATCTTTGGAAGGTTTCAGGTTG |

Gene products: m36b4, mouse acidic ribosomal phosphoprotein P0; mCcl2, mouse C-C motif chemokine ligand 2; mDpp4, mouse dipeptidyl peptidase-4; mF480 (*Adgre1*), mouse adhesion G protein-coupled receptor E1; mTnfa, mouse tumor necrosis factor alpha; mIl6, mouse interleukin 6; mIl1b, mouse interleukin 1 beta; hHPRT, human hypoxanthine guanine phosphoribosyl transferase; hCCL2, human C-C motif chemokine ligand 2; hIL6, human interleukin 6.

**Supplementary Table 2: LC-MS/MS spectral analyses.****Supplementary Table 2a: Normalized LC-MS/MS spectral counts of selected FPLC fractions of plasma from DIO mice.**

Proteins with higher normalized spectral counts in FPLC fraction 44 (F44; active in inducing *Mcp1* in macrophages) than in fractions F42 and F46, which were inactive in this assay:

| Identified Proteins                                | MW      | LC-MS/MS spectra |     |     |
|----------------------------------------------------|---------|------------------|-----|-----|
|                                                    |         | F42              | F44 | F46 |
| Haptoglobin Hp                                     | 39 kDa  | 4                | 32  | 8   |
| Isoform 2 of Cytosol aminopeptidase Lap3           | 53 kDa  | 0                | 29  | 3   |
| Cluster of Thrombospondin-4 Thbs4 (TSP4_MOUSE)     | 106 kDa | 7                | 27  | 6   |
| Vascular endothelial growth factor receptor 3 Flt4 | 153 kDa | 10               | 26  | 0   |
| Isoform 2 of Dipeptidase 2 Dpep2                   | 64 kDa  | 0                | 17  | 3   |
| Vasorin Vasn                                       | 72 kDa  | 0                | 10  | 0   |
| Suprabasin Sbsn                                    | 70 kDa  | 0                | 7   | 4   |
| Dipeptidyl peptidase 4 Dpp4                        | 87 kDa  | 0                | 6   | 0   |
| Tyrosine-protein kinase Mer Merk                   | 110 kDa | 0                | 5   | 0   |
| Cartilage oligomeric matrix protein Comp           | 82 kDa  | 0                | 4   | 0   |
| Bleomycin hydrolase Blmh                           | 53 kDa  | 0                | 3   | 0   |
| Isoform 2 of Cell surface glycoprotein MUC18 Mcam  | 67 kDa  | 0                | 2   | 0   |

Normalized spectral counts of other proteins identified fractions 42, 44, and/or 46:

| Identified Proteins                                           | MW      | LC-MS/MS spectra |      |      |
|---------------------------------------------------------------|---------|------------------|------|------|
|                                                               |         | F42              | F44  | F46  |
| Cluster of Complement C3 C3<br>(sp P01027 CO3_MOUSE)          | 186 kDa | 636              | 1269 | 4071 |
| Cluster of Inter alpha-trypsin inhibitor, heavy chain 4 Itih4 | 105 kDa | 57               | 981  | 798  |
| Alpha-2-macroglobulin A2m                                     | 166 kDa | 2965             | 916  | 584  |
| Complement C5 C5                                              | 189 kDa | 9                | 807  | 430  |
| Cluster of Complement factor H Cfh (CFAH_MOUSE)               | 139 kDa | 2116             | 780  | 360  |
| Antithrombin-III Serpinc1                                     | 52 kDa  | 404              | 633  | 434  |
| Complement C4-B C4b                                           | 193 kDa | 373              | 621  | 731  |
| Cluster of Albumin (ALBU_BOVIN)                               | 69 kDa  | 662              | 611  | 710  |
| Inter-alpha trypsin inhibitor, heavy chain 2 Itih2            | 106 kDa | 645              | 530  | 350  |
| Oxidation resistance protein 1 C7                             | 93 kDa  | 7                | 345  | 308  |
| Serum albumin Alb                                             | 69 kDa  | 452              | 339  | 694  |
| Inter-alpha-trypsin inhibitor heavy chain H1 Itih1            | 101 kDa | 928              | 334  | 178  |
| Fibrinogen beta chain Fgb                                     | 55 kDa  | 873              | 299  | 91   |
| Cluster of Keratin, type II cytoskeletal 2 epidermal KRT2     | 65 kDa  | 293              | 294  | 387  |
| Plasma kallikrein Klkb1                                       | 71 kDa  | 253              | 242  | 136  |
| Cluster of Alpha-1-antitrypsin 1-1 Serpina1a                  | 46 kDa  | 275              | 239  | 253  |

|                                                             |         |     |     |     |
|-------------------------------------------------------------|---------|-----|-----|-----|
| Cluster of Kininogen-1 Kng1                                 | 73 kDa  | 283 | 236 | 129 |
| Inter-alpha-trypsin inhibitor heavy chain H3 Itih3          | 99 kDa  | 62  | 233 | 309 |
| Glycosylphosphatidylinositol specific phospholipase D1      | 94 kDa  | 703 | 217 | 79  |
| Cluster of Keratin, type I cytoskeletal 10 KRT10            | 59 kDa  | 297 | 212 | 307 |
| Plasma protease C1 inhibitor Serping1                       | 56 kDa  | 35  | 208 | 193 |
| Fibrinogen gamma chain Fgg                                  | 49 kDa  | 540 | 203 | 130 |
| Histidine-rich glycoprotein Hrg                             | 59 kDa  | 245 | 191 | 184 |
| Protein Fga Fga                                             | 87 kDa  | 539 | 191 | 101 |
| Isoform 2 of Leukemia inhibitory factor receptor Lifr       | 81 kDa  | 16  | 189 | 153 |
| Carboxypeptidase N subunit 2 Cpn2                           | 60 kDa  | 383 | 160 | 46  |
| Isoform 2 of Ig gamma-2B chain C region Igh-3               | 37 kDa  | 50  | 155 | 151 |
| Cluster of Ceruloplasmin Cp (G3X8Q5_MOUSE)                  | 124 kDa | 45  | 154 | 471 |
| Cluster of Serine protease inhibitor A3K Serpina3k          | 47 kDa  | 155 | 150 | 169 |
| Protein AMBP Ambp                                           | 39 kDa  | 115 | 137 | 98  |
| Epidermal growth factor receptor Egfr                       | 135 kDa | 0   | 132 | 176 |
| Fibronectin Fn1                                             | 273 kDa | 716 | 130 | 107 |
| Ig gamma-1 chain C region secreted form Ighg1               | ?       | 43  | 118 | 175 |
| Cluster of Protein Z-dependent protease inhibitor Serpina10 | 52 kDa  | 0   | 104 | 145 |
| Cluster of Protein Ighg2c Ighg2c (F6TQW2_MOUSE)             | 44 kDa  | 6   | 101 | 168 |
| Complement factor I Cfi                                     | 67 kDa  | 0   | 99  | 96  |
| Apolipoprotein A-I Apoa1                                    | 31 kDa  | 113 | 97  | 151 |
| Hepatocyte growth factor activator Hgfac                    | 71 kDa  | 40  | 88  | 146 |
| Cluster of Protein Gm20547 Gm20547 (B8JJN0_MOUSE)           | 142 kDa | 5   | 81  | 267 |
| Cluster of Serotransferrin Tf (TRFE_MOUSE)                  | 77 kDa  | 107 | 75  | 239 |
| Properdin Cfp                                               | 50 kDa  | 131 | 72  | 21  |
| Ig mu chain C region Ighm                                   | ?       | 234 | 69  | 41  |
| C4b-binding protein C4bpa                                   | 52 kDa  | 17  | 64  | 41  |
| Isoform 2 of Ig gamma-3 chain C region                      | 36 kDa  | 37  | 63  | 164 |
| Phosphatidylcholine-sterol acyltransferase Lcat             | 50 kDa  | 131 | 56  | 29  |
| Cluster of Extracellular matrix protein 1 Ecm1              | 63 kDa  | 147 | 56  | 17  |
| Vitronectin Vtn                                             | 55 kDa  | 33  | 56  | 91  |
| Phospholipid transfer protein Pltp                          | 54 kDa  | 181 | 52  | 13  |
| Vitamin K-dependent protein Z Proz                          | 44 kDa  | 0   | 49  | 41  |
| HMW kininogen-II Kng2                                       | 71 kDa  | 58  | 46  | 37  |
| Ig alpha chain C region                                     | ?       | 29  | 45  | 44  |
| Cluster of Angiotensin-converting enzyme Ace                | 151 kDa | 0   | 43  | 47  |
| Complement component C8 beta chain C8b                      | 66 kDa  | 40  | 42  | 127 |
| Carboxypeptidase N catalytic chain Cpn1                     | 52 kDa  | 120 | 41  | 7   |
| Gelsolin Gsn                                                | 86 kDa  | 16  | 40  | 239 |
| Cluster of Isoform M1 of Pyruvate kinase PKM Pkm            | 58 kDa  | 0   | 36  | 15  |

|                                                           |         |     |    |     |
|-----------------------------------------------------------|---------|-----|----|-----|
| Transferrin receptor protein 1 Tfrc                       | 86 kDa  | 0   | 34 | 50  |
| Coagulation factor XIII B chain F13b                      | 76 kDa  | 218 | 32 | 38  |
| Complement component C8 alpha chain C8a                   | 65 kDa  | 43  | 32 | 134 |
| Coagulation factor XIII A chain F13a1                     | 83 kDa  | 392 | 31 | 2   |
| Plasminogen Plg                                           | 91 kDa  | 62  | 29 | 60  |
| Cluster of Ig heavy chain V region AC38 205.12 (          | ?       | 26  | 29 | 31  |
| Macrophage colony-stimulating factor 1 receptor Csf1r     | 109 kDa | 0   | 29 | 26  |
| Ig heavy chain V region 102                               | ?       | 0   | 24 | 32  |
| Platelet-activating factor acetylhydrolase Pla2g7         | 49 kDa  | 29  | 23 | 0   |
| Prothrombin F2                                            | 70 kDa  | 14  | 22 | 43  |
| Cluster of Vascular cell adhesion protein 1 Vcam1         | 81 kDa  | 15  | 22 | 3   |
| Cluster of Protein Gm4788 Gm4788<br>(E9Q8B5_MOUSE)        | 99 kDa  | 19  | 21 | 44  |
| Cluster of Isoform C of Fibulin-1 Fbln1                   | 75 kDa  | 92  | 20 | 3   |
| Cluster of Prenylcysteine oxidase Pcyox1<br>(PCYOX_MOUSE) | 56 kDa  | 55  | 19 | 0   |
| Protein Krt78 Krt78                                       | 112 kDa | 24  | 19 | 26  |
| Complement factor H-related 1 Cfhr1                       | 38 kDa  | 20  | 18 | 4   |
| Maltase-glucoamylase Mgam                                 | 209 kDa | 118 | 17 | 19  |
| Isoform 2 of Periostin Postn                              | 90 kDa  | 25  | 16 | 6   |
| Cluster of H-2 class I histocompatibility antigen, Q10    | 37 kDa  | 36  | 15 | 12  |
| Alpha-2-HS-glycoprotein Ahsg                              | 37 kDa  | 7   | 15 | 44  |
| Interleukin-1 receptor accessory protein Il1rap           | 74 kDa  | 7   | 14 | 28  |
| Hemopexin Hpx                                             | 51 kDa  | 0   | 13 | 156 |
| Cluster of Protein C1s1 C1s1 (E9Q6C2_MOUSE)               | 77 kDa  | 45  | 13 | 66  |
| Cluster of Sulfated glycoprotein 1 Psap<br>(E9PZ00_MOUSE) | 61 kDa  | 62  | 13 | 0   |
| Cluster of Ig heavy chain V region 6.96<br>(HVM57_MOUSE)  | 11 kDa  | 14  | 13 | 25  |
| NADP-dependent malic enzyme Me1                           | 64 kDa  | 0   | 13 | 17  |
| Cluster of Alpha-2-antiplasmin Serpinf2<br>(A2AP_MOUSE)   | 55 kDa  | 5   | 12 | 45  |
| Coagulation factor X F10                                  | 54 kDa  | 0   | 12 | 75  |
| Neural cell adhesion molecule 1 Ncam1                     | 119 kDa | 7   | 12 | 3   |
| Isoform 2 of Sulfhydryl oxidase 1 Qsox1                   | 73 kDa  | 0   | 11 | 148 |
| Apolipoprotein A-IV Apoa4                                 | 45 kDa  | 12  | 11 | 50  |
| Cluster of Serum paraoxonase/arylesterase 1 Pon1          | 40 kDa  | 7   | 11 | 0   |
| Protein Ighv6-5 Ighv6-5                                   | 11 kDa  | 10  | 11 | 17  |
| Cluster of Clusterin Clu (CLUS_MOUSE)                     | 52 kDa  | 12  | 10 | 17  |
| Napsin-A Napsa                                            | 46 kDa  | 15  | 10 | 0   |
| GDH/6PGL endoplasmic bifunctional protein H6pd            | 90 kDa  | 0   | 10 | 10  |
| Vitamin D-binding protein Gc                              | 54 kDa  | 9   | 9  | 6   |
| Chromogranin-A Chga                                       | 52 kDa  | 7   | 9  | 0   |

|                                                             |         |    |   |     |
|-------------------------------------------------------------|---------|----|---|-----|
| Coagulation factor V F5                                     | 247 kDa | 14 | 8 | 11  |
| Isoform 2 of Complement factor D Cfd                        | 28 kDa  | 0  | 8 | 16  |
| CD5 antigen-like Cd5l                                       | 39 kDa  | 31 | 7 | 4   |
| Cadherin-5 Cdh5                                             | 88 kDa  | 30 | 6 | 24  |
| Cluster of Pyrethroid hydrolase Ces2e Ces2e                 | 62 kDa  | 26 | 6 | 9   |
| Ig heavy chain V region AMPC1                               | ?       | 0  | 6 | 13  |
| Cholinesterase Bche                                         | 68 kDa  | 52 | 5 | 0   |
| EGF-containing fibulin-like matrix protein 1 Efemp1         | 55 kDa  | 6  | 5 | 18  |
| Cluster of Heat shock cognate 71 kDa protein Hspa8          | 71 kDa  | 10 | 5 | 0   |
| Cluster of Carboxylesterase 1C Ces1c (EST1C_MOUSE)          | 61 kDa  | 0  | 4 | 44  |
| Cluster of Complement C1r-A subcomponent C1ra               | 80 kDa  | 72 | 4 | 0   |
| Peptidase inhibitor 16 Pi16                                 | 54 kDa  | 87 | 4 | 0   |
| SPARC-like protein 1 Sparcl1                                | 72 kDa  | 42 | 4 | 0   |
| Mannan-binding lectin serine protease 1 Masp1               | 80 kDa  | 6  | 4 | 3   |
| 78 kDa glucose-regulated protein Hspa5                      | 72 kDa  | 17 | 4 | 0   |
| Cluster of Afamin Afm (sp O89020 AFAM_MOUSE)                | 69 kDa  | 0  | 3 | 77  |
| Hepatocyte growth factor-like protein Mst1                  | 80 kDa  | 0  | 3 | 23  |
| Lysosomal alpha-mannosidase Man2b1                          | 115 kDa | 43 | 3 | 0   |
| Heparin cofactor 2 Serpind1                                 | 54 kDa  | 0  | 3 | 13  |
| Heat shock 70 kDa protein 4 Hspa4                           | 94 kDa  | 0  | 3 | 6   |
| Xanthine dehydrogenase/oxidase Xdh                          | 147 kDa | 0  | 3 | 7   |
| Mannan-binding lectin serine protease 2 Masp2               | 76 kDa  | 4  | 3 | 0   |
| Alpha globin 1 Hba-a1                                       | 15 kDa  | 0  | 3 | 2   |
| Beta-2-glycoprotein 1 Apoh                                  | 39 kDa  | 0  | 2 | 58  |
| Apolipoprotein E Apoe                                       | 36 kDa  | 11 | 2 | 3   |
| Coagulation factor XII F12                                  | 66 kDa  | 0  | 0 | 137 |
| Cluster of Apolipoprotein B-100 Apob (APOB_MOUSE)           | 509 kDa | 59 | 0 | 15  |
| Insulin-like growth factor-binding protein Igfals           | 67 kDa  | 21 | 0 | 51  |
| Vitamin K-dependent protein S Pros1                         | 75 kDa  | 0  | 0 | 64  |
| Lumican Lum                                                 | 38 kDa  | 0  | 0 | 40  |
| Aminopeptidase N Anpep                                      | 110 kDa | 0  | 0 | 24  |
| Transforming growth factor-beta-induced protein ig-h3 Tgfbi | 75 kDa  | 2  | 0 | 16  |
| Cluster of Heat shock protein HSP 90-beta Hsp90ab1          | 83 kDa  | 5  | 0 | 0   |
| heparan sulfate proteoglycan core protein Hspg2             | 398 kDa | 2  | 0 | 0   |
| Selenoprotein P Sepp1                                       | 43 kDa  | 0  | 0 | 11  |
| Receptor-type tyrosine-protein phosphatase gamma Ptprg      | 161 kDa | 16 | 0 | 0   |
| Talin-1 Tln1                                                | 270 kDa | 9  | 0 | 0   |
| Cluster of Beta-globin Hbbt1 (A8DUK4_MOUSE)                 | 16 kDa  | 4  | 0 | 8   |
| Platelet glycoprotein Ib alpha chain Gp1ba                  | 80 kDa  | 12 | 0 | 0   |

|                                                       |         |    |   |    |
|-------------------------------------------------------|---------|----|---|----|
| Cluster of Alpha actinin 1a Actn1 (A1BN54_MOUSE)      | 103 kDa | 11 | 0 | 0  |
| Cluster of Granulins Grn (GRN_MOUSE)                  | 63 kDa  | 0  | 0 | 8  |
| Ig lambda-1 chain C region                            | ?       | 0  | 0 | 10 |
| Catalase Cat                                          | 60 kDa  | 0  | 0 | 4  |
| L-selectin Sell                                       | 42 kDa  | 0  | 0 | 14 |
| Anthrax toxin receptor 2 Antxr2                       | 53 kDa  | 7  | 0 | 0  |
| Angiopoietin-related protein 3 Angptl3                | 53 kDa  | 7  | 0 | 0  |
| Beta-1,4 N-acetylgalactosaminyltransferase 1 B4galnt1 | 59 kDa  | 0  | 0 | 8  |
| Protein C6 C6                                         | 104 kDa | 0  | 0 | 3  |
| N-acetylmuramoyl-L-alanine amidase Pglyrp2            | 58 kDa  | 0  | 0 | 8  |
| Corticosteroid-binding globulin Serpina6              | 45 kDa  | 0  | 0 | 8  |
| Pantetheinase Vnn1                                    | 57 kDa  | 2  | 0 | 0  |
| Cluster of Ig heavy chain V region 441                | ?       | 0  | 0 | 2  |
| Complement component C1q receptor Cd93                | 69 kDa  | 10 | 0 | 0  |
| DNA segment, Chr 17, human D6S56E 5                   | 66 kDa  | 0  | 0 | 7  |
| Ig heavy chain V regions TEPC 15/S107/HPCM1           | ?       | 9  | 0 | 0  |
| Adenylyl cyclase-associated protein 1 Cap1            | 52 kDa  | 4  | 0 | 0  |
| Cluster of Hyaluronan-binding protein 2 Habp2         | 61 kDa  | 0  | 0 | 7  |
| Coagulation factor IX F9                              | 53 kDa  | 0  | 0 | 5  |
| Fermitin family homolog 3 Fermt3                      | 76 kDa  | 0  | 0 | 3  |
| Ig heavy chain V region 3 Ighv1-61                    | ?       | 0  | 0 | 3  |
| UTP--glucose-1-phosphate uridylyltransferase Ugp2     | 57 kDa  | 2  | 0 | 0  |
| Seprase Fap                                           | 85 kDa  | 4  | 0 | 0  |
| Dentin sialophosphoprotein Dspp                       | 94 kDa  | 9  | 0 | 0  |
| Melanocyte protein PMEL Pmel                          | 66 kDa  | 5  | 0 | 0  |
| Nucleobindin-1 Nucleob1                               | 53 kDa  | 0  | 0 | 2  |
| Aspartyl aminopeptidase Dnpep                         | 52 kDa  | 5  | 0 | 0  |
| Complement component C9 C9                            | 62 kDa  | 0  | 0 | 4  |
| Growth arrest-specific protein 6 Gas6                 | 75 kDa  | 4  | 0 | 0  |
| 4F2 cell-surface antigen heavy chain Slc3a2           | 62 kDa  | 0  | 0 | 3  |
| Cluster of Kinase insert domain protein receptor Kdr  | 150 kDa | 2  | 0 | 0  |
| Retinal dehydrogenase 1 Aldh1a1                       | 54 kDa  | 0  | 0 | 3  |
| Isoform 2 of Carboxypeptidase Q Cpq                   | 50 kDa  | 0  | 0 | 2  |
| serine/threonine protein kinase FAM20C Fam20c         | 66 kDa  | 0  | 0 | 3  |
| 60S ribosomal protein L13a Rpl13a                     | 48 kDa  | 0  | 0 | 2  |
| Heparan N-sulfatase Sgsh                              | 57 kDa  | 0  | 0 | 3  |
| Actin, cytoplasmic 1 Actb                             | 42 kDa  | 2  | 0 | 0  |
| Bone morphogenetic protein 1 Bmp1                     | 112 kDa | 0  | 0 | 2  |

**Supplementary Table 2b: Normalized LC-MS/MS spectral counts in selected FPLC fractions of plasma from DIO mice that was immunodepleted of DPP4.**

Proteins with higher normalized spectral counts in FPLC fraction F44 (active in inducing *Mcp1* in macrophages after the addition of rDPP4) than in fractions F42 and F46, which were inactive in this assay:

| Identified Proteins                               | MW      | Normalized spectral counts |     |     |
|---------------------------------------------------|---------|----------------------------|-----|-----|
|                                                   |         | F42                        | F44 | F46 |
| Complement component C8 alpha chain C8a           | 66 kDa  | 139                        | 559 | 289 |
| Coagulation factor XII F12                        | 66 kDa  | 21                         | 247 | 138 |
| Clusterin Clu                                     | 52 kDa  | 120                        | 232 | 120 |
| Complement component C8 gamma chain C8g           | 23 kDa  | 57                         | 225 | 141 |
| Insulin-like growth factor-binding protein Igfals | 67 kDa  | 127                        | 217 | 81  |
| Coagulation factor X F10                          | 54 kDa  | 105                        | 155 | 57  |
| Hepatocyte growth factor-like protein Mst1        | 81 kDa  | 19                         | 33  | 12  |
| Transcobalamin-2 Tcn2                             | 48 kDa  | 6                          | 31  | 19  |
| Coagulation factor IX F9                          | 53 kDa  | 0                          | 30  | 15  |
| Fructose-bisphosphate aldolase A Aldoa            | 39 kDa  | 0                          | 20  | 9   |
| Cluster of Pyrethroid hydrolase Ces2e Ces2e       | 62 kDa  | 4                          | 16  | 9   |
| Coagulation factor XIII A chain F13a1             | 83 kDa  | 4                          | 14  | 9   |
| Vinculin Vcl                                      | 117 kDa | 0                          | 8   | 0   |
| Granulins Grn                                     | 63 kDa  | 0                          | 4   | 0   |
| Platelet glycoprotein V Gp5                       | 63 kDa  | 0                          | 3   | 0   |

Normalized spectral counts of other proteins identified fractions 42, 44, and/or 46:

| Identified Proteins                                  | MW      | Normalized spectral counts |      |      |
|------------------------------------------------------|---------|----------------------------|------|------|
|                                                      |         | F42                        | F44  | F46  |
| Cluster of Murinoglobulin-1 Mug1 (MUG1_MOUSE)        | 165 kDa | 4655                       | 1823 | 281  |
| Ceruloplasmin Cp                                     | 121 kDa | 391                        | 1086 | 1927 |
| Antithrombin-III Serpinc1                            | 52 kDa  | 1258                       | 1024 | 430  |
| Serum albumin Alb                                    | 69 kDa  | 1237                       | 969  | 1322 |
| Complement factor B Cfb                              | 85 kDa  | 127                        | 870  | 869  |
| Hemopexin Hpx                                        | 51 kDa  | 35                         | 748  | 1983 |
| Inter alpha-trypsin inhibitor, heavy chain 4 Itih4   | 105 kDa | 1251                       | 743  | 222  |
| Apolipoprotein A-I Apoa1                             | 31 kDa  | 1481                       | 705  | 373  |
| Complement C4-B C4b                                  | 193 kDa | 1140                       | 666  | 148  |
| Afamin Afm                                           | 69 kDa  | 169                        | 620  | 494  |
| Ig gamma-1 chain C region, membrane-bound form Ighg1 | 43 kDa  | 702                        | 565  | 248  |
| Ig gamma-2B chain C region Igh-3                     | 44 kDa  | 737                        | 510  | 195  |
| Cluster of Alpha-1-antitrypsin 1-5 Serpina1e         | 46 kDa  | 610                        | 502  | 436  |
| Cluster of Ig gamma-2A chain C region secreted form  | 37 kDa  | 487                        | 421  | 242  |
| Alpha-2-antiplasmin Serpinf2                         | 55 kDa  | 61                         | 413  | 372  |
| Vitronectin Vtn                                      | 55 kDa  | 83                         | 400  | 364  |

|                                                       |         |     |     |      |
|-------------------------------------------------------|---------|-----|-----|------|
| Ig gamma-3 chain C region                             | 44 kDa  | 410 | 378 | 199  |
| Gelsolin Gsn                                          | 86 kDa  | 91  | 375 | 1231 |
| Apolipoprotein A-IV Apoa4                             | 45 kDa  | 442 | 303 | 88   |
| Complement factor I Cfi                               | 67 kDa  | 101 | 288 | 228  |
| Beta-2-glycoprotein 1 Apoh                            | 39 kDa  | 4   | 285 | 561  |
| Complement C5 C5                                      | 189 kDa | 519 | 283 | 47   |
| Prothrombin F2                                        | 70 kDa  | 8   | 275 | 904  |
| Epidermal growth factor receptor Egfr                 | 135 kDa | 393 | 269 | 82   |
| Ig kappa chain C region                               | 12 kDa  | 308 | 257 | 119  |
| Histidine-rich glycoprotein Hrg                       | 59 kDa  | 382 | 247 | 103  |
| Inter-alpha-trypsin inhibitor heavy chain H3 Itih3    | 99 kDa  | 471 | 240 | 30   |
| Plasma protease C1 inhibitor Serping1                 | 56 kDa  | 378 | 237 | 45   |
| Cluster of Carboxylesterase 1C Ces1c (EST1C_MOUSE)    | 61 kDa  | 16  | 217 | 1757 |
| Lumican Lum                                           | 38 kDa  | 147 | 196 | 124  |
| Cluster of Ig lambda-2 chain C region Iglc2           | 11 kDa  | 276 | 183 | 29   |
| Serotransferrin Tf                                    | 77 kDa  | 226 | 181 | 547  |
| Cluster of Serine protease inhibitor A3K Serpina3k    | 47 kDa  | 195 | 179 | 2034 |
| Ig lambda-1 chain C region                            | 12 kDa  | 171 | 177 | 29   |
| Sulfhydryl oxidase 1 Qsox1                            | 83 kDa  | 191 | 170 | 166  |
| Protein Z-dependent protease inhibitor Serpina10      | 52 kDa  | 213 | 168 | 55   |
| Kininogen-1 Kng1                                      | 73 kDa  | 214 | 163 | 262  |
| Coagulation factor XIII B chain F13b                  | 76 kDa  | 208 | 148 | 63   |
| Haptoglobin Hp                                        | 39 kDa  | 373 | 136 | 29   |
| Cluster of Actin, cytoplasmic 1 Actb (ACTB_MOUSE)     | 42 kDa  | 51  | 127 | 135  |
| Vitamin D-binding protein Gc                          | 54 kDa  | 43  | 121 | 111  |
| Cluster of Ig kappa chain V-III region PC 7043        | 12 kDa  | 143 | 113 | 41   |
| N-acetylmuramoyl-L-alanine amidase Pglyrp2            | 58 kDa  | 0   | 112 | 109  |
| Apolipoprotein E Apoe                                 | 36 kDa  | 238 | 104 | 30   |
| Alpha-2-macroglobulin A2m                             | 166 kDa | 180 | 97  | 38   |
| Cluster of Hemoglobin subunit beta-1 Hbb-b1           | 16 kDa  | 224 | 93  | 24   |
| Inter-alpha-trypsin inhibitor heavy chain H2 Itih2    | 106 kDa | 258 | 91  | 13   |
| Cluster of Ig heavy chain V region AC38 205.12        | 13 kDa  | 115 | 86  | 39   |
| Complement component C9 C9                            | 62 kDa  | 0   | 82  | 326  |
| Complement factor H Cfh                               | 139 kDa | 239 | 70  | 12   |
| Protein AMBP Ambp                                     | 39 kDa  | 119 | 69  | 12   |
| Hepatocyte growth factor activator Hgfac              | 71 kDa  | 98  | 65  | 7    |
| Ig heavy chain V region 3-6 Ighv3-6                   | 13 kDa  | 67  | 63  | 30   |
| Cluster of Ig heavy chain V region 5-84 (HVM54_MOUSE) | 13 kDa  | 58  | 60  | 24   |
| Alpha-2-HS-glycoprotein Ahsg                          | 37 kDa  | 88  | 59  | 99   |
| Plasma kallikrein Klkb1                               | 71 kDa  | 127 | 59  | 10   |

|                                                             |         |     |    |     |
|-------------------------------------------------------------|---------|-----|----|-----|
| Serum paraoxonase/arylesterase 1 Pon1                       | 40 kDa  | 121 | 58 | 12  |
| Cluster of Glutathione peroxidase 3 Gpx3 (GPX3_MOUSE)       | 25 kDa  | 17  | 52 | 108 |
| Ig heavy chain V region 102                                 | 13 kDa  | 78  | 52 | 19  |
| Fibrinogen alpha chain Fga                                  | 87 kDa  | 57  | 46 | 21  |
| Hemoglobin subunit alpha Hba                                | 15 kDa  | 101 | 46 | 29  |
| Cluster of H-2 class I histocompatibility antigen           | 37 kDa  | 147 | 43 | 10  |
| Cluster of Ig kappa chain V-V region HP 123E6 (KV5AD_MOUSE) | 12 kDa  | 64  | 43 | 10  |
| Cluster of Ig mu chain C region Ighm (IGHM_MOUSE)           | 50 kDa  | 56  | 42 | 12  |
| Corticosteroid-binding globulin Serpina6                    | 45 kDa  | 0   | 42 | 134 |
| Phosphatidylinositol-glycan-specific phospholipase D Gpld1  | 93 kDa  | 63  | 41 | 21  |
| Ig kappa chain V-V region MOPC 149                          | 12 kDa  | 40  | 36 | 10  |
| Fibrinogen gamma chain Fgg                                  | 49 kDa  | 55  | 36 | 9   |
| Cluster of Ig kappa chain V-V region L6 (Fragment)          | 13 kDa  | 68  | 36 | 14  |
| Ig heavy chain V region B1-8/186-2 Ighv1-72                 | 15 kDa  | 56  | 36 | 13  |
| Ig lambda-1 chain V region                                  | 12 kDa  | 39  | 35 | 22  |
| Cluster of Ig heavy chain V-III region J606                 | 13 kDa  | 29  | 31 | 0   |
| Vitamin K-dependent protein S Pros1                         | 75 kDa  | 37  | 30 | 0   |
| Vitamin K-dependent protein C Proc                          | 52 kDa  | 19  | 28 | 23  |
| Carboxypeptidase Q Cpq                                      | 52 kDa  | 0   | 28 | 26  |
| Fructose-bisphosphate aldolase B Aldob                      | 40 kDa  | 0   | 28 | 16  |
| Leukemia inhibitory factor receptor Lifr                    | 123 kDa | 101 | 27 | 0   |
| Cluster of Complement C1s-A subcomponent C1sa               | 77 kDa  | 30  | 26 | 5   |
| Inter-alpha-trypsin inhibitor heavy chain H1 Itih1          | 101 kDa | 75  | 26 | 5   |
| Extracellular superoxide dismutase [Cu-Zn] Sod3             | 27 kDa  | 74  | 25 | 5   |
| Serum amyloid A-4 protein Saa4                              | 15 kDa  | 54  | 25 | 0   |
| Ig lambda-2 chain V region                                  | 12 kDa  | 15  | 25 | 9   |
| Plasminogen Plg                                             | 91 kDa  | 19  | 24 | 116 |
| Fibrinogen beta chain Fgb                                   | 55 kDa  | 43  | 24 | 6   |
| Ig kappa chain V-II region 26-10                            | 12 kDa  | 33  | 24 | 13  |
| Ig kappa chain V-V region L7 (Fragment) Gm10881             | 13 kDa  | 21  | 24 | 8   |
| Inhibitor of carbonic anhydrase Ica                         | 77 kDa  | 0   | 22 | 291 |
| Heparin cofactor 2 Serpind1                                 | 54 kDa  | 0   | 21 | 125 |
| Ig alpha chain C region                                     | 37 kDa  | 41  | 21 | 2   |
| Vitamin K-dependent protein Z Proz                          | 44 kDa  | 52  | 20 | 5   |
| Carboxypeptidase N subunit 2 Cpn2                           | 60 kDa  | 53  | 18 | 5   |
| Ig kappa chain V-II region 7S34.1                           | 12 kDa  | 18  | 18 | 4   |
| Ig kappa chain V-V region MOPC 41 Gm5571                    | 14 kDa  | 24  | 17 | 10  |
| Ig kappa chain V-V region K2 (Fragment)                     | 13 kDa  | 17  | 17 | 16  |
| Ig kappa chain V19-17 Igk-V19-17                            | 16 kDa  | 14  | 16 | 12  |

|                                                                   |         |    |    |    |
|-------------------------------------------------------------------|---------|----|----|----|
| Ig kappa chain V-V region MOPC 173                                | 12 kDa  | 30 | 16 | 0  |
| Ig heavy chain V region MOPC 47A                                  | 13 kDa  | 14 | 15 | 7  |
| Complement C2 C2                                                  | 85 kDa  | 31 | 13 | 4  |
| Ig lambda-2 chain V region MOPC 315                               | 13 kDa  | 17 | 13 | 0  |
| Ig kappa chain V-V regions                                        | 12 kDa  | 17 | 13 | 0  |
| Apolipoprotein A-II ApoA2                                         | 11 kDa  | 15 | 12 | 0  |
| Interleukin-1 receptor accessory protein Il1rap                   | 66 kDa  | 21 | 11 | 53 |
| Selenoprotein P Sepp1                                             | 43 kDa  | 10 | 11 | 24 |
| Ig heavy chain V region 441                                       | 13 kDa  | 12 | 11 | 0  |
| Transferrin receptor protein 1 Tfrc                               | 86 kDa  | 30 | 9  | 0  |
| EGF-containing fibulin-like extracellular matrix protein 1 Efemp1 | 55 kDa  | 4  | 9  | 9  |
| Lactotransferrin Ltf                                              | 78 kDa  | 0  | 9  | 16 |
| Sorbitol dehydrogenase Sord                                       | 38 kDa  | 0  | 8  | 5  |
| Transthyretin Ttr                                                 | 16 kDa  | 8  | 8  | 2  |
| Cathepsin E Ctse                                                  | 43 kDa  | 5  | 8  | 2  |
| Carbonic anhydrase 2 Ca2                                          | 29 kDa  | 0  | 7  | 67 |
| Cluster of Betaine--homocysteine S-methyltransferase 1 Bhmt       | 45 kDa  | 0  | 7  | 5  |
| Biotinidase Btd                                                   | 58 kDa  | 0  | 6  | 25 |
| Apolipoprotein D Apod                                             | 22 kDa  | 31 | 6  | 0  |
| Cluster of Ig kappa chain V-VI region NQ6-8.3.1 (KV6A9_MOUSE)     | 12 kDa  | 5  | 6  | 0  |
| Apolipoprotein M Apom                                             | 21 kDa  | 16 | 6  | 0  |
| Phosphatidylcholine-sterol acyltransferase Lcat                   | 50 kDa  | 16 | 5  | 0  |
| Angiotensinogen Agt                                               | 52 kDa  | 0  | 5  | 4  |
| Ig heavy chain V region 3 Ighv1-61                                | 13 kDa  | 0  | 5  | 0  |
| Serum amyloid P-component Apcs                                    | 26 kDa  | 0  | 5  | 38 |
| Extracellular matrix protein 1 Ecm1                               | 63 kDa  | 9  | 5  | 0  |
| Cadherin-5 Cdh5                                                   | 88 kDa  | 12 | 4  | 0  |
| Macrophage colony-stimulating factor 1 receptor Csf1r             | 109 kDa | 7  | 4  | 0  |
| Carboxypeptidase N catalytic chain Cpn1                           | 52 kDa  | 18 | 4  | 0  |
| Apolipoprotein C-II Apoc2                                         | 11 kDa  | 11 | 4  | 0  |
| Insulin-like growth factor-binding protein 3 Igfbp3               | 32 kDa  | 6  | 4  | 0  |
| Cluster of Pyruvate kinase PKM Pkm (KPYM_MOUSE)                   | 58 kDa  | 21 | 3  | 0  |
| Adiponectin Adipoq                                                | 27 kDa  | 18 | 3  | 0  |
| Phospholipid transfer protein Pltp                                | 54 kDa  | 9  | 3  | 0  |
| Mannan-binding lectin serine protease 1 Masp1                     | 80 kDa  | 10 | 3  | 0  |
| Collagen alpha-1(III) chain Col3a1                                | 139 kDa | 0  | 3  | 0  |
| Cadherin-1 Cdh1                                                   | 98 kDa  | 5  | 2  | 0  |
| Hyaluronan-binding protein 2 Habp2                                | 62 kDa  | 0  | 2  | 0  |

|                                                                        |         |    |   |    |
|------------------------------------------------------------------------|---------|----|---|----|
| Structural maintenance of chromosomes protein 5 Smc5                   | 129 kDa | 0  | 2 | 0  |
| Cluster of Complement C1r-A subcomponent C1ra                          | 80 kDa  | 0  | 0 | 0  |
| Complement C1q subcomponent subunit A C1qa                             | 26 kDa  | 0  | 0 | 0  |
| Complement C1q subcomponent subunit B C1qb                             | 27 kDa  | 0  | 0 | 0  |
| Complement C1q subcomponent subunit C C1qc                             | 26 kDa  | 0  | 0 | 0  |
| Ig kappa chain V-III region ABPC 22/PC 9245                            | 12 kDa  | 0  | 0 | 0  |
| Ig heavy chain V region 93G7                                           | 16 kDa  | 0  | 0 | 0  |
| Fibronectin Fn1                                                        | 273 kDa | 0  | 0 | 0  |
| Ig kappa chain V-VI region XRPC 44                                     | 12 kDa  | 6  | 0 | 0  |
| Dipeptidyl peptidase 4 Dpp4                                            | 87 kDa  | 0  | 0 | 0  |
| Beta-2-microglobulin B2m                                               | 14 kDa  | 9  | 0 | 0  |
| CD5 antigen-like Cd5l                                                  | 39 kDa  | 0  | 0 | 0  |
| Carboxypeptidase B2 Cpb2                                               | 49 kDa  | 0  | 0 | 10 |
| Thyroxine-binding globulin Serpina7                                    | 47 kDa  | 0  | 0 | 8  |
| Apolipoprotein C-III Apoc3                                             | 11 kDa  | 13 | 0 | 0  |
| Apolipoprotein C-I Apoc1                                               | 10 kDa  | 9  | 0 | 0  |
| cAMP-dependent protein kinase type II-alpha regulatory subunit Prkar2a | 45 kDa  | 4  | 0 | 0  |
| Cytosol aminopeptidase Lap3                                            | 56 kDa  | 6  | 0 | 0  |
| C4b-binding protein C4bpa                                              | 52 kDa  | 9  | 0 | 0  |
| Angiotensin-converting enzyme Ace                                      | 151 kDa | 7  | 0 | 0  |
| Collagen alpha-1(I) chain Colla1                                       | 138 kDa | 0  | 0 | 5  |
| Tetranectin Clec3b                                                     | 22 kDa  | 7  | 0 | 0  |
| Mannan-binding lectin serine protease 2 Masp2                          | 76 kDa  | 5  | 0 | 0  |
| Properdin Cfp                                                          | 50 kDa  | 0  | 0 | 0  |
| Regulator of G-protein signaling 9 Rgs9                                | 77 kDa  | 3  | 0 | 0  |
| Albumin                                                                | 69 kDa  | 5  | 0 | 0  |
| Platelet-activating factor acetylhydrolase Pla2g7                      | 49 kDa  | 5  | 0 | 0  |
| A-kinase anchor protein SPHKAP Sphkap                                  | 185 kDa | 0  | 0 | 0  |
| L-selectin Sell                                                        | 42 kDa  | 3  | 0 | 0  |
| Periostin Postn                                                        | 93 kDa  | 6  | 0 | 0  |
| Collagen alpha-2(I) chain Colla2                                       | 130 kDa | 0  | 0 | 2  |
| Alpha-2-macroglobulin-P A2mp                                           | 164 kDa | 8  | 0 | 0  |
| Cluster of Serum amyloid A-1 protein Saa1 (SAA1_MOUSE)                 | 14 kDa  | 6  | 0 | 0  |
| 72 kDa type IV collagenase Mmp2                                        | 74 kDa  | 0  | 0 | 5  |
| Coagulation factor VII F7                                              | 50 kDa  | 0  | 0 | 4  |
| Ig heavy chain V regions TEPC 15/S107/HPCM1/HPCM2/HPCM3                | 14 kDa  | 0  | 0 | 0  |
| C-reactive protein Crp                                                 | 25 kDa  | 0  | 0 | 4  |
| Peptidyl-tRNA hydrolase ICT1, mitochondrial Ict1                       | 23 kDa  | 3  | 0 | 0  |
| Mannose-binding protein A Mbl1                                         | 25 kDa  | 0  | 0 | 3  |

|                                                         |         |   |   |   |
|---------------------------------------------------------|---------|---|---|---|
| DENN domain-containing protein 2C Dennd2c               | 104 kDa | 0 | 0 | 2 |
| Vascular cell adhesion protein 1 Vcam1                  | 81 kDa  | 2 | 0 | 0 |
| Regulating synaptic membrane exocytosis protein 2 Rims2 | 173 kDa | 2 | 0 | 0 |
| Protein FAM179B Fam179b                                 | 195 kDa | 2 | 0 | 0 |
